# Supplementary material for: Implications for a Wireless, External Device System to Study Electrocorticography
Source: MDPI journal article supplement (doi:10.3390/s17040761), 2017-04-04

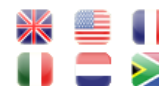

Ihr Kundenlogin:

E-Mail-Adresse  
  
Passwort

[Passwort vergessen?](#)

PCB-POOL

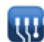

PCB-OVERSEAS

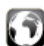

LASER-STENCIL

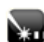

BETA-eSTORE

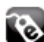

FRONT PANEL

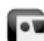

3D-PROTOTYPES

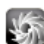

Sie befinden sich hier: **Bestellung**

## LEITERPLATTENKONFIGURATION

### Ihre Leiterplatte

Gewünschte Anzahl: 3

|                         | Netto<br>EUR  | Brutto<br>EUR |
|-------------------------|---------------|---------------|
| Preis pro Stück         | 40.64         | 48.36         |
| <b>Warenwert gesamt</b> | <b>121.92</b> | <b>145.08</b> |

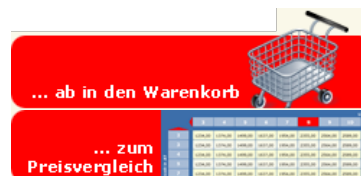

Sie können auch gern [unsere ergonomische Benutzeroberfläche](#) zur Leiterplattenkonfiguration benutzen. Bitte beachten Sie, dass dazu die Aktivierung von Javascript in Ihrem Browser notwendig ist.

Ein kleiner Tipp: Anstatt nach dem Bearbeiten einer Position auf "Speichern" zu klicken, können Sie auch auf "Bearbeiten" der nächsten Position klicken, da werden Ihre Daten ebenfalls gespeichert.

|                            |                                                                                                 |                                           |
|----------------------------|-------------------------------------------------------------------------------------------------|-------------------------------------------|
| 1. Lagenzahl               | 2                                                                                               | <input type="button" value="Bearbeiten"/> |
| 2. Liefermenge             | 3                                                                                               | <input type="button" value="Bearbeiten"/> |
| 3. Abmessungen             | 61mm x 110mm                                                                                    | <input type="button" value="Bearbeiten"/> |
| 3a. Nutzen [?]             | Mindestfläche optimal ausnutzen                                                                 | <input type="button" value="Bearbeiten"/> |
| 4. Basismaterial [?]       | FR4, 35µmCu, 1,6mm                                                                              | <input type="button" value="Bearbeiten"/> |
| 5. Stopplack [?]           | ja                                                                                              | <input type="button" value="Bearbeiten"/> |
| 6. Bestückungsdruck [?]    | nein                                                                                            | <input type="button" value="Bearbeiten"/> |
| 7. Oberfläche [?]          | chem. Nickel/Gold (ENIG) für superflache Pads                                                   | <input type="button" value="Bearbeiten"/> |
| 8. Layoutvorgaben          | Min. Leiterbahnstärke / -abstand: >= 0.125mm (5mil)<br>Min. Bohrendurchmesser: >= 0.3mm (12mil) | <input type="button" value="Bearbeiten"/> |
| 9. Überlieferung [?]       | nein                                                                                            | <input type="button" value="Bearbeiten"/> |
| 10. Magic-PCB [?]          | nein                                                                                            | <input type="button" value="Bearbeiten"/> |
| 11. E-Test [?]             | ja                                                                                              | <input type="button" value="Bearbeiten"/> |
| 12. Lieferzeit [?]         | 8 Arbeitstag(e)                                                                                 | <input type="button" value="Bearbeiten"/> |
| 13. Dateiformat [?]        | EAGLE                                                                                           | <input type="button" value="Bearbeiten"/> |
| 14. Projektname            | IGLOO                                                                                           | <input type="button" value="Bearbeiten"/> |
| 15. Free Stencil [?]       | ja                                                                                              | <input type="button" value="Bearbeiten"/> |
| 16. Bestückung [?]         | nein                                                                                            | <input type="button" value="Bearbeiten"/> |
| 17. FITS-or-NOT-Nummer [?] | Ist noch nicht gewählt!                                                                         | <input type="button" value="Bearbeiten"/> |
| 18. Serienproduktion?      |                                                                                                 | <input type="button" value="Bearbeiten"/> |

Jetzt **DIREKT** aus **EAGLE**  
(ab Version 5.1001)  
**Leiterplattenpreise und  
Bestückung sicherer  
und schneller  
kalkulieren**  
Download hier:

Installationsanleitung  
[Manual als PDF](#)

Automatische Installation  
(Windows):  
[PCB-POOL® BUTTON](#)

Manuelle Installation  
(alle unterstützten OS):  
[PCB-POOL® BUTTON](#)

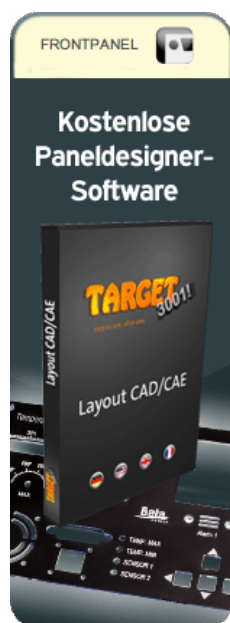

Supplement: s1 [file s1]
