# Supplementary material for: Implications for a Wireless, External Device System to Study Electrocorticography
Source: MDPI journal article supplement (doi:10.3390/s17040761), 2017-04-04
Supplement: s1 [file s1]

# LogiCORE IP FIFO Generator v8.1

## *User Guide*

UG175 March 1, 2011

An updated version of [UG175](#) is available in the Xilinx Documentation Center.
