# Supplementary material for: Implications for a Wireless, External Device System to Study Electrocorticography
Source: MDPI journal article supplement (doi:10.3390/s17040761), 2017-04-04
Supplement: s1 [file s1]

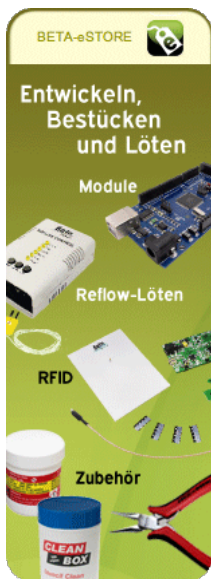

Sie befinden sich hier: **Bestellung | Leiterplatten**

## LEITERPLATTENKONFIGURATION

Andere Spezifikationen?

Wechseln zur HTML-Version

|                            |                                                                                                                                                                                                                                                                                                                                                                                                                                                                                                                                                                                                                                                                                                                                                                                                                                                                                                                                                                                                                                               |
|----------------------------|-----------------------------------------------------------------------------------------------------------------------------------------------------------------------------------------------------------------------------------------------------------------------------------------------------------------------------------------------------------------------------------------------------------------------------------------------------------------------------------------------------------------------------------------------------------------------------------------------------------------------------------------------------------------------------------------------------------------------------------------------------------------------------------------------------------------------------------------------------------------------------------------------------------------------------------------------------------------------------------------------------------------------------------------------|
| 1. Lagenzahl [?]           | <input type="radio"/> 1 <input checked="" type="radio"/> 2 <input type="radio"/> 4 <input type="radio"/> 6                                                                                                                                                                                                                                                                                                                                                                                                                                                                                                                                                                                                                                                                                                                                                                                                                                                                                                                                    |
| 2. Liefermenge             | <input type="text" value="4"/>                                                                                                                                                                                                                                                                                                                                                                                                                                                                                                                                                                                                                                                                                                                                                                                                                                                                                                                                                                                                                |
| 3. Abmessungen [?]         | Länge in mm: <input type="text" value="38"/> Breite in mm: <input type="text" value="60"/>                                                                                                                                                                                                                                                                                                                                                                                                                                                                                                                                                                                                                                                                                                                                                                                                                                                                                                                                                    |
| 3a. Nutzen                 | <input checked="" type="radio"/> Mindestfläche optimal ausnutzen<br><input type="radio"/> Nutzen online konfigurieren                                                                                                                                                                                                                                                                                                                                                                                                                                                                                                                                                                                                                                                                                                                                                                                                                                                                                                                         |
| 4. Basismaterial [?]       | <input checked="" type="radio"/> FR4, 35µmCu, 1,6mm<br><input type="radio"/> FR4, 35µmCu, 1,0mm                                                                                                                                                                                                                                                                                                                                                                                                                                                                                                                                                                                                                                                                                                                                                                                                                                                                                                                                               |
| 5. Stopplack [?]           | <input checked="" type="radio"/> ja <input type="radio"/> nein                                                                                                                                                                                                                                                                                                                                                                                                                                                                                                                                                                                                                                                                                                                                                                                                                                                                                                                                                                                |
| 6. Bestückungsdruck [?]    | <input type="radio"/> ja, nur BS <input type="radio"/> ja, nur LS<br><input type="radio"/> ja, BS und LS <input checked="" type="radio"/> nein                                                                                                                                                                                                                                                                                                                                                                                                                                                                                                                                                                                                                                                                                                                                                                                                                                                                                                |
| 7. Oberfläche [?]          | <input checked="" type="radio"/> chem. Nickel/Gold (ENIG) für superflache Pads<br><input type="radio"/> HAL (Hot Air Leveling)                                                                                                                                                                                                                                                                                                                                                                                                                                                                                                                                                                                                                                                                                                                                                                                                                                                                                                                |
| 8. Layoutvorgaben [?]      | Min. Leiterbahnstärke / -abstand:<br><input checked="" type="radio"/> >= 0.125mm (5mil)<br><input type="radio"/> >= 0.150mm (6mil)<br><br>Min. Bohrendurchmesser:<br><input type="radio"/> >= 0.2mm (8mil)<br><input checked="" type="radio"/> >= 0.3mm (12mil)                                                                                                                                                                                                                                                                                                                                                                                                                                                                                                                                                                                                                                                                                                                                                                               |
| 9. Überlieferung [?]       | <input type="radio"/> ja, wenn vorhanden <input checked="" type="radio"/> nein<br><input type="radio"/> ja, wenn vorhanden als Magic-PCB® - mit kostenlosem RFID Chip eingebettet ( <b>Wichtige Information</b> )                                                                                                                                                                                                                                                                                                                                                                                                                                                                                                                                                                                                                                                                                                                                                                                                                             |
| 10. Magic-PCB [?]          | <input checked="" type="radio"/> nein <input type="radio"/> ja, ohne Anbindung<br><input type="radio"/> ja, Anbindung elektrisch                                                                                                                                                                                                                                                                                                                                                                                                                                                                                                                                                                                                                                                                                                                                                                                                                                                                                                              |
| 11. E-Test [?]             | <input checked="" type="radio"/> ja <input type="radio"/> nein                                                                                                                                                                                                                                                                                                                                                                                                                                                                                                                                                                                                                                                                                                                                                                                                                                                                                                                                                                                |
| 12. Lieferzeit in AT [?]   | <input type="radio"/> 1 <input type="radio"/> 2 <input type="radio"/> 3 <input type="radio"/> 4<br><input type="radio"/> 5 <input type="radio"/> 7 <input checked="" type="radio"/> 8                                                                                                                                                                                                                                                                                                                                                                                                                                                                                                                                                                                                                                                                                                                                                                                                                                                         |
| 13. Dateiformat [?]        | <input type="text" value="EAGLE"/>                                                                                                                                                                                                                                                                                                                                                                                                                                                                                                                                                                                                                                                                                                                                                                                                                                                                                                                                                                                                            |
| 14. Projektname            | <input type="text" value="RHD2132-2-SATA"/>                                                                                                                                                                                                                                                                                                                                                                                                                                                                                                                                                                                                                                                                                                                                                                                                                                                                                                                                                                                                   |
| 15. Free Stencil [?]       | <input checked="" type="radio"/> ja, ich will <input type="radio"/> nein                                                                                                                                                                                                                                                                                                                                                                                                                                                                                                                                                                                                                                                                                                                                                                                                                                                                                                                                                                      |
| 16. Bestückung [?]         | <input type="radio"/> ja <input checked="" type="radio"/> nein<br><br><b>Anzahl:</b><br><input type="text" value="4"/> zu bestückende Einzelleiterplatten<br><input type="text"/> SMT-Bauteile pro Einzelleiterplatte [?]<br><input type="text"/> THT-Bauteile pro Einzelleiterplatte [?]<br><b>Bauteilbestückung</b><br><input checked="" type="radio"/> einseitig<br><input type="radio"/> beidseitig<br><b>Bauteile [?]</b><br><input checked="" type="radio"/> stelle ich bei<br><input type="radio"/> stelle ich teilw eise bei, Rest bitte bestellen*<br><input type="radio"/> bitte für mich bestellen *<br><br>* Die Bestellung erfolgt gemäß Ihrer angegebenen Lieferantenbestellnummern. Es werden 1:1 die aktuellen Listenpreise der Lieferanten berechnet.<br><b>Lieferzeit der Bestückung</b><br><input type="text" value="12"/> AT nach Fertigstellung der Leiterplatten und nach Eintreffen der für Sie bestellten oder von Ihnen beigestellten Bauteile<br><b>Preis der Bestückung</b><br>167.79 EUR zuzüglich Bauteilekosten |
| 17. FITS-or-NOT-Nummer [?] | <input type="text"/>                                                                                                                                                                                                                                                                                                                                                                                                                                                                                                                                                                                                                                                                                                                                                                                                                                                                                                                                                                                                                          |
| 18. Serienproduktion?      | Sind Sie zusätzlich an einem Angebot für eine höhere Stückzahl interessiert?<br><input type="checkbox"/> ja, bitte                                                                                                                                                                                                                                                                                                                                                                                                                                                                                                                                                                                                                                                                                                                                                                                                                                                                                                                            |

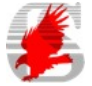

LADEN SIE IHRE DATEI FÜR DARSTELLUNG HOCH

Datei auswählen   Keine ausgewählt

Hochladen (.brd)

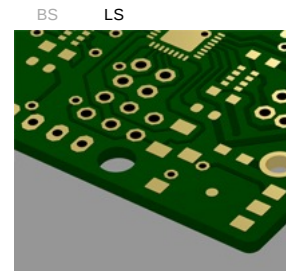

PCB

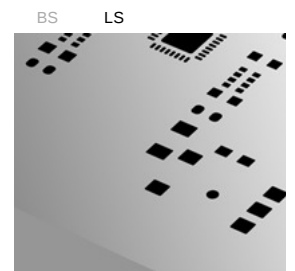

FREE Stencil

(c) copyright 2014, **Impressa, AGB (nur für Unternehmer), Kundeninformationen, Widerrufsbelehrung, Datenschutz**  
Beta LAYOUT GmbH | Im Aartal 14 | 65326 Aarbergen | Deutschland  
Telefon: +49 (0)6120 90701.0 | Telefax: +49 (0)6120 90701.4  
E-Mail: [info@pcb-pool.com](mailto:info@pcb-pool.com)  
kostenlose Hotline: **0800 PCBPOOL**  
0800 7227665
