# Supplementary material for: Implications for a Wireless, External Device System to Study Electrocorticography
Source: MDPI journal article supplement (doi:10.3390/s17040761), 2017-04-04
Supplement: s1 [file s1]

Article

# Open Hardware: Towards a Fully-Wireless Sub-Cranial Neuro-Implant for Measuring Electroencephalography Signals

David Rotermund<sup>1,\*</sup>, Jonas Pistor<sup>2</sup>, Janpeter Hoeffmann<sup>2</sup>, Tim Schellenberg<sup>3</sup>, Dmitriy Boll<sup>4</sup>, Elena Tolstosheeva<sup>4</sup>, Dieter Gauck<sup>5</sup>, Heiko Stemmann<sup>5</sup>, Dagmar Peters-Drolshagen<sup>2</sup>, Andreas K. Kreiter<sup>5</sup>, Martin Schneider<sup>3</sup>, Steffen Paul<sup>2</sup>, Walter Lang<sup>4</sup>, and Klaus R. Pawelzik<sup>1</sup>

<sup>1</sup> University of Bremen, Institute for Theoretical Physics, Bremen, Germany

<sup>2</sup> University of Bremen, Institute of Electrodynamics and Microelectronics, Bremen, Germany

<sup>3</sup> University of Bremen, RF and Microwave Engineering Laboratory, Bremen, Germany

<sup>4</sup> University of Bremen, Institute for Microsensors, -Actuators and -Systems, Bremen, Germany

<sup>5</sup> University of Bremen, Institute for Brain Research, Bremen, Germany

\* Correspondence: davrot@neuro.uni-bremen.de; Tel.: +49-421-218-62003

Academic Editor: name

Version December 13, 2016 submitted to *Sensors*; Typeset by L<sup>A</sup>T<sub>E</sub>X using class file mdpi.cls

**Abstract:** Implantable neuronal interfaces to the brain are an important keystone for future medical applications. However, entering this field of research is difficult since such an implant requires components from many different areas of technology. Since the complete avoidance of wires is important due to the risk of infections and other long-term problems, means for wireless transmitting data and energy are a necessity which adds to the requirements. In recent literature many high-tech components for such implants are presented with remarkable properties. However, these components are typically not freely available for your system. Every group needs to re-develop their own solution. This raises the question if it is possible to create a reusable design for an implant and its external base-station, such that it allows other groups to use it as a starting point. In this article we try to answer this question by presenting a design based exclusively on commercial off-the-shelf components and studying the properties of the resulting system. Following this idea, we present a fully wireless neuronal implant for simultaneously measuring electroencephalography signals at 128 locations from the surface of the brain. All design files are available as open source.

**Keywords:** neuro-implant; ECoG; wireless implant; Open Hardware; neuro-prosthetic

## 1. Introduction

There is nothing more drastic in a person's life than losing motor control over the own body (e.g. by a neuro-degenerative disease, stroke or paraplegia), getting blind or losing limbs. The actual state of medical technology has only limited options for helping this group of people. Results from brain-research suggest that it should be possible to build technical medical devices which interact with the neuronal activity patterns of the brain to ease the loss of life quality and partially restore functionality (e.g. creating visual perception [1–3] and extracting information from neuronal activities [4–7]). Even with the limited knowledge of today, astonishing assisting systems for this group of people are possible [2,8–10]. One important example are invasive brain-computer interfaces (BCI), which allow to control computers or robot-arms by evaluating the actual spatio-temporal cortical activity patterns (e.g. [4–6,8,9,11–15] and many more).

Transferring such systems into the daily medical routine remains a highly challenging task. Effective control of external devices with invasive BCIs requires recording of neuronal data with

28 high temporal and spatial resolution, which is best achieved with intracortical recordings. However,  
29 intracortical implantation of electrodes might lead to brain damage. Furthermore, recording quality  
30 usually degrades over time due to formation of scar tissue around the electrodes. An applicable  
31 compromise are electrocorticography (ECoG) signals, recorded from the surface of the brain or the  
32 dura mater, which still contain detailed information usable for BCI [16–21]. Further requirements  
33 for an implantable interface are long-term stability (up to several decades), bio-compatibility, and  
34 persistence against humidity. From a functional point of view these systems need to provide a  
35 high spatial- and temporal resolution to measure and/or change the neuronal activity patterns in  
36 the human brain.

37 To achieve the functionality of neuro-prostheses, complex data analysis procedures need to  
38 be applied in real time [5,16,22–24]. With current technology, it is not possible to perform this  
39 computationally extensive data processing with processor units placed inside the human body. The  
40 main reason is the high amount of heat produced by the processors, which would lead to tissue  
41 damage [25–27]. Therefore, a neuro-prosthesis needs to consist of two parts: an implanted device  
42 with recording (and optionally stimulation) capabilities and an external analysis/ control system.  
43 However, a tethered data transmission between the two parts has an inherent risk of infection [28–30],  
44 cerebral fluid loss, as well as bio-mechanical problems in chronic applications. A solution of this  
45 problem is a wireless connection between the implant and the base station. This would allow to fully  
46 embed the implant inside the human body without physical connections. It would be even more  
47 advantageous if the implant could completely be placed inside the human skull (e.g. for keep the  
48 fluidic environment around the brain intact). Following these requirements, the implant has to be  
49 capable of exchanging data wirelessly with an external base station through skull, fat, fluids and  
50 skin. In order to avoid components with limited lifetimes like batteries, a wireless power link has to  
51 provide the energy for the implant.

52 Although there are approaches for wireless data exchange [31] (using various technologies,  
53 e.g. Ultra-Wide Band [32], Offset Quadrature Phase Shift Keying [33], Amplitude Shift Keying [34],  
54 Frequency Shift Key Modulation [35], RF backscattering [36] and RF ID Technology [37]) and energy  
55 transmission systems [38–40], especially for neuronal implants, these systems are not available on  
56 the market. Thus, it is nearly impossible for other groups to obtain and (re)use these systems. We  
57 would like to support other researchers in the field by providing them with a wireless energy- and  
58 data interface, and thus push their research and enable them to focus on other functional parts of  
59 their system. Therefore, we present here a neuro-implant for sub-cranial implantation that is based  
60 on commercial off-the-shelf (COTS) components.

61 Our system is targeted for animal experiments. In the long run, we aim at a system for human  
62 medical applications. In 2010 we started to design an application specific integrated circuit (ASIC)  
63 [41] which was able to communicate with the undocumented analog-digital-converter on the Intan  
64 Tech bio-signal amplifier RHA 2116 for collecting electrophysiological data. Later we improved this  
65 ASIC design by upgrading it with support for the wireless module ([42,43]) which we present here in  
66 detail. Those first prototypes were based on large and fully rigid FR-4 PCBs. Because it is important  
67 that the implant follows the curvature of the brain [44], we started preparation for integrating all  
68 components on an industry grade flexible PCB-foil.

69 Here we present our wireless module and its base station for exchanging data and providing  
70 energy to the implant. For the first time, we make all design files (circuit diagrams, board designs,  
71 test boards, firmware and software) available as open source. Furthermore, we re-implemented  
72 the functionality of our ASIC as a firmware for a Microsemi IGLOO nano FPGA. We also wrote  
73 a second IGLOO nano FPGA firmware for supporting the newer Intan RHD2132 with better ADC  
74 performance, instead of using the undocumented ADC features of the Intan RHA2116. Both  
75 firmwares are also part of the open-source package as well as test boards for the Microsemi nano  
76 FPGA and the Intan RHD2132. This allows us to present a design which can be built completely from  
77 commercial off-the-shelf components and make it available as open-source. Since the Microsemi nano

78 FPGA and the Intan RHA/ RHD are all available as bare dies, the size of the system is suitable for an  
 79 implant usable for human medical applications.

80 In parallel, we investigated how our ASIC with our open-source wireless module and Intan  
 81 RHA2116 operates on an industry grade flexible PCB-foil. We analyze the results and report which  
 82 problems arose. Furthermore, we are examining the temperature distribution around the implant in  
 83 measurements and simulations.

## 84 2. Results

### 85 2.1. System concept

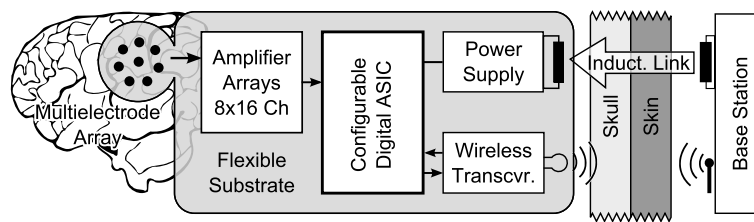

Figure 1. Concept of the implant with its base station.

86 Our design goal was to build a system that can be implanted completely subcranially, which is  
 87 supplied with energy via a wireless link (without any implanted batteries) and which exchanges data  
 88 wirelessly with an external base station. Figure 1 shows the functional blocks necessary for such a  
 89 system.

90 An array of electrodes serves as an interface between the brain tissue and a set of integrated  
 91 analog signal amplifiers with band-pass properties. After the amplification of the neuronal signals,  
 92 analog-digital converters digitize the incoming signals and generate several digital data streams. An  
 93 Application Specific Integrated Circuit (ASIC) filters these data streams according to user-defined  
 94 specifications and merges the parallel streams into a single one, optimized for a minimal bandwidth.  
 95 The condensed data stream is re-packed into transmission packages and transmitted via an RF  
 96 transceiver data link to an external base station. The base station receives the data packages and  
 97 unpacks, checks, and repacks them. These newly built packages, optimized for fast processing by 32  
 98 or 64-bit CPUs, are sent via Ethernet to an external PC for further use (e.g. visualization and analysis).  
 99 From the external PC, the base station receives instructions about the user defined parameters for the  
 100 data processing of the implant and transmits them to the implant to set the desired configuration  
 101 in the ASIC. Beside the bi-directional wireless data exchange, the implant collects energy from an  
 102 inductive wireless power link for power supply.



120 On the primary side (base station) we used the bqTESLA wireless power evaluation kit  
121 (bq25046EVM-687) as a off-the-shelf low-cost power transmitter [46]. On the secondary side, a  
122 BQ51013YFFT IC as power receiver is part of the design [47]. This chip-sized ball grid array (BGA)  
123 contains the means to communicate with the external energy transmitter, rectification of the inducted  
124 AC wave, and voltage regulation. The receiver IC delivers a 5V power rail. If this IC is used, then  
125 two important design aspects have to be considered: 1.) Many of the required ceramic capacitors  
126 on the side of the secondary coil need to be rated for 50V. As a result, the capacitors with larger  
127 capacitance are too thick for some target areas of implantation. Therefore, it is necessary to split them  
128 into several smaller parallel capacitors. 2.) Due to the small distance between the balls of the BGA,  
129 it was not possible to contact important pads in a typical fashion. Thus, it is necessary to place *via*  
130 holes underneath the pads for the BGA package. This requires the *via* to be filled up and closed with a  
131 planar surface, which is quite demanding for the (external) manufacturer of the printed circuit board  
132 (PCB).

133 The 5V output of the power receiver IC is too high for operating the RF transceiver and other  
134 active components. Thus, a highly efficient and very small DC/DC converter is required. We applied  
135 a Torex XCL 206 step-down micro DC/DC converter with built-in inductor which only requires  
136 two small capacitors as external components [48]. In the expected operating point, it works with  
137 an efficiency over 80%. Due to its switching nature, PI filters, for smoothing the DC supply rail,  
138 are advised on the consumer side. However, additional capacitive loads exceeding 50 $\mu$ F, by e.g. PI  
139 filters and block capacitors for the ICs, cause problems and loads beyond 70 $\mu$ F stopped the DC/DC  
140 converter from working at all.

141 **Data Transfer:** The wireless data transfer is based on Microsemi ZL70102 transceivers [49]. The  
142 RF transceiver operates in the Medical Implant Communication Service frequency band (MICS, 401 -  
143 406 MHz) and is commercially available for medical applications including implants. The transceiver  
144 establishes a bi-directional wireless link, using 4-FSK or 2-FSK mode of operation. In order to achieve  
145 a high data rate, especially for a continuous data streaming, it is necessary to provide a large extra  
146 memory for the controller, which is operating the transceiver via SPI on the implant site. This is  
147 necessary because pauses of unknown origin in the data transfer of up to 80 ms may randomly occur.  
148 The transceiver is available as a chip-sized BGA.

149 The ZL70102 requires several external components. Among those is a 24 MHz clock. We used a  
150 very small (2 mm x 1.6 mm x 0.7 mm) CMOS 3.3 V clock from NDK (NZ2016SA) [50]. Besides driving  
151 the transceiver, it also provides a clock signal for other components (e.g. ADCs, microcontroller,  
152 FPGAs or ASICs (e.g. [51]) for data processing).

153 Between the RF transceiver and the antenna (circular loop antenna with 5mm diameter), we  
154 installed an adaptive antenna-matching circuit with a SAW filter (RF Monolithics RF3607D, 403.5  
155 MHz SAW filter) [52]. The adaption of the matching circuit is accomplished by using two tunable  
156 capacitors which are part of the ZL70102. Those are optimized by the transceiver automatically. The  
157 SAW filter is one of the largest components (3.8 mm x 3.8 mm x 1.0 mm) on the implant.

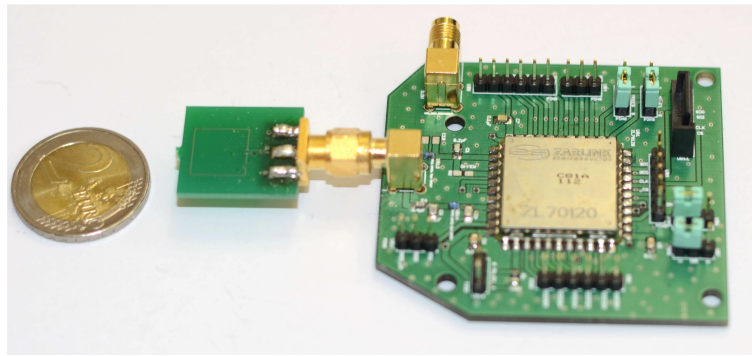

**Figure 4.** Base station RF transceiver module based on a Microsemi ZL70120 module and an in-house designed antenna. The rest of the base station has to be connected via SPI to this module.

158 For the base-station module outside the body, a solution based on a Microsemi ZL70120 was  
 159 designed [53]. Among other components, this Microsemi RF transceiver base station module contains  
 160 a ZL70102, antenna-matching circuit and a clock. We designed a simple PCB for this module and  
 161 added a 50 Ohm rectangular loop antenna to it (see Figure 4). Via SPI, we operated this transceiver  
 162 base station module with a FPGA using a custom firmware. This FPGA is part of a board (Orange  
 163 Tree ZestET1) with Gigabit Ethernet connectivity [54]. This allows to stream the data from the implant  
 164 to an external PC via TCP/IP. The base station also supplies the implant with control sequences from  
 165 the PC using the other direction of communication.

### 166 2.3. The implant prototype

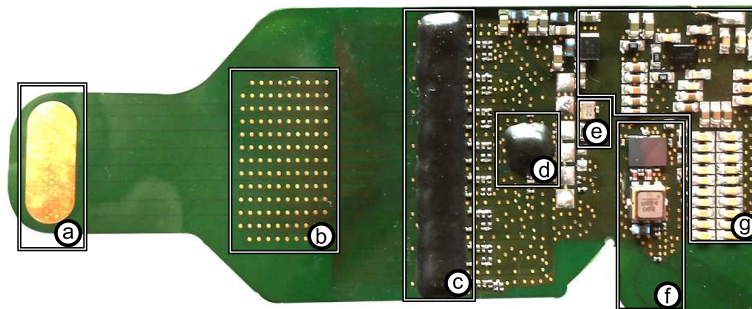

**Figure 5.** Implant prototype: (a) Reference electrode, (b) 128 electrodes, (c) 8xRHA, (d) ASIC, (e) 24 MHz clock, (f) RF-transceiver, (g) Inductive energy link

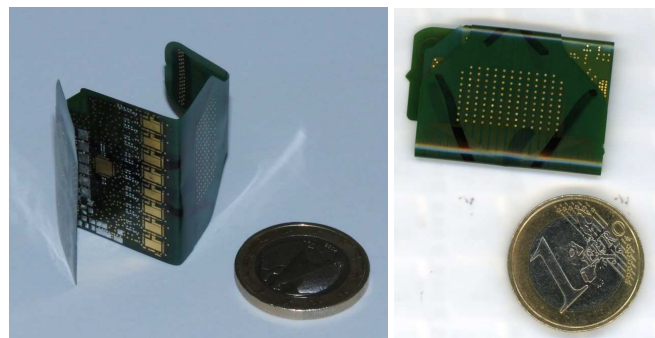

**Figure 6.** The implant is based on a flexible substrate, which allows it to be folded along three lines. This reduces the required space for implantation

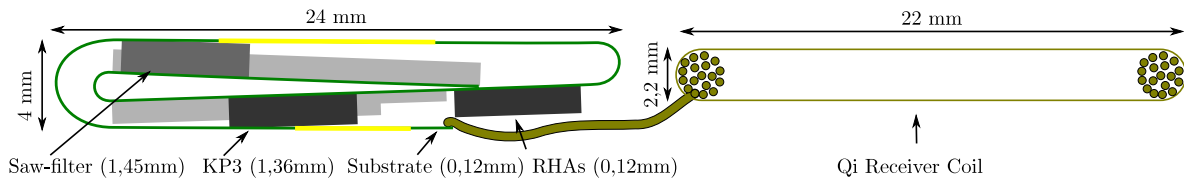

**Figure 7.** Kalomed Prototype with bending radius of 0.64mm (left) and coil for power supply (right)

167 The described system for the implant was realized (see Figure 5) with 128 gold electrodes in an  
 168 area of 9mm x 17mm with a diameter of 0.4mm for the individual electrodes and a center-to-center  
 169 electrode distance of 1.4mm on a flexible 50 $\mu$ m thick PCB-foil (DuPont Pyralux AP). This PCB-foil has  
 170 a size of 34mm x 79mm. It can be folded at 3 lines (see Figure 6) to further reduce the overall size of  
 171 the implant as shown in Figure 7. All electrical components are placed on one side of the two-layered  
 172 PCB-foil with respect to the polyimide process developed for future implementations. The weight of  
 173 the implant is 1.72g, and it fits into a volume of 4mmx24mmx32mm excluding the power-link coil.  
 174 The coil has a square shape with a side length of 22mm and a thickness of 2.2mm.

175 **Analog front-end:** For the analog front-end Intan RHA2116 chips are used, which include the  
 176 neural amplifiers and an analog-to-digital converter (ADC). Eight of these ICs are part of one implant,  
 177 where each RHA provides 16 analog channels. The RHA contains, beside bio-signal amplifiers with  
 178 a band-pass filter, an ADC that allows sampling all its individual channels at 10 kHz and 16 bit  
 179 resolution. The integrated ADC is documented in a previous version of the RHA2116 data sheet.  
 180 This part of the description was removed from the actual documentation. For newer designs, it is  
 181 suggested to use the Intan RHD2132. We chose to operate the ADCs with their full 10 kHz sample  
 182 rate which allows to reuse this setup with intracortical electrodes for recording action potentials.  
 183 These ADCs generate 8 parallel data streams with a total of 20.48 MBit/s. On the other end of the  
 184 data processing chain, the RF transceiver is only capable of transmitting up to 0.515 MBit /s.

185 **ASIC:** The 8 ADC data streams are collected by an in-house designed digital ASIC [42]. Besides  
 186 serializing these parallel inputs, the ASIC has the capability to significantly reduce the incoming data  
 187 according to user-defined parameters such as sample rate, resolution and the selection of electrodes  
 188 which are included in the recording. Since the performance of the implanted electrodes can degrade  
 189 with time, all the parameters can be changed dynamically during runtime in order to utilize the  
 190 limited RF data bandwidth in an optimal way. Thus the implant uses the bi-directional nature of the  
 191 RF link for receiving user-control commands from the base station during operation. The ASIC also  
 192 controls the RF transceiver (e.g. initializing the connection and its parameters) as well as provides and  
 193 caches the outgoing data (embedded into a suitable and compact transmission protocol) for achieving  
 194 a high and continuous data transmission rate via the SPI connection. Furthermore, the ASIC contains  
 195 integrated test-pattern generators, which can be used instead of the real measurement data from the  
 196 Intan RHA2116 ICs.

**Table 1.** Usage of the IGLOO nano FPGA resources for an implant with Intan RHA or RHD analog front-end. A large portion (up to 33% in the case with RHAs) of these core resources are by optional virtual RHAs/ RHDs for testing purposes.

| Resource               | Usage (RHA)        | Usage (RHD)        |
|------------------------|--------------------|--------------------|
| CORE                   | 5859 of 6144 (95%) | 5236 of 6144 (85%) |
| IO (W/ clocks)         | 38 of 68 (56%)     | 38 of 68 (56%)     |
| GLOBAL (Chip+Quadrant) | 6 of 18 (33%)      | 6 of 18 (33%)      |
| PLL                    | 0 of 1 (0%)        | 0 of 1 (0%)        |
| RAM/FIFO               | 8 of 8 (100%)      | 8 of 8 (100%)      |

197 **Nano FPGA:** Taking the data processing structures from the ASIC, we re-implemented the  
 198 design in a way suitable for Microsemi IGLOO AGLN250 nano field programmable gate arrays.

199 This allows us to provide a complete neuro-implant development system as open source solution  
 200 exclusively using off-the-shelf components. Besides implementing the firmware for the Intan RHA  
 201 analog-front end, we also wrote a second version for the newer Intan RHDs. Table 1 shows the  
 202 required resources on the FPGA. The bare die of the FPGA is only slightly bigger (3.22mm x 3.48mm)  
 203 compared with the ASIC but has a larger buffer for avoiding data loss during data transmission  
 204 pauses. However, this component is still small enough to be used on a neuro-implant development  
 205 system with the same size. In future designs of our implant development prototype, the nano FPGA  
 206 will allow us to develop and test new versions of the data processing while keeping the test system  
 207 in realistic dimensions. We provide the RHA and RHD based nano FPGA firmwares as well as tests  
 208 boards for the Microsemi nano FPGA and the Intan RHD2132 as open source.

209 **Problems with flexible PCBs:** Due to problems with the quality of the PCB foils (shorts created  
 210 by shifts between the layers of the foil during production), the implant prototype used for testing  
 211 was equipped with only one instead of all 8 amplifier arrays. This has an effect on the power  
 212 consumption (each RHA array consumes 5mW in this scenario) and consequently on the number of  
 213 available channels for measurements. For testing different configurations, the 16 physically available  
 214 measurement channels can be combined with the internal RHA test pattern generators in our ASIC.  
 215 Besides the missing RHA arrays, the prototype supports all functions of the final implant, especially  
 216 the complete wireless power and data transmission.

#### 217 2.4. Performance of the wireless module

218 Examples boards with the wireless module were produced on 150 $\mu$ m thick FR4 and 50 $\mu$ m thick  
 219 flexible PCB-foil substrates. Both versions were tested successfully. However, due to the required  
 220 very fine resolution (50  $\mu$ m strip width and distance between elements) of the PCBs, most of the  
 221 flexible PCB-foils were produced with faults (e.g. shortcuts). Fortunately, we were able to fix some of  
 222 them by manual cutting and grinding.

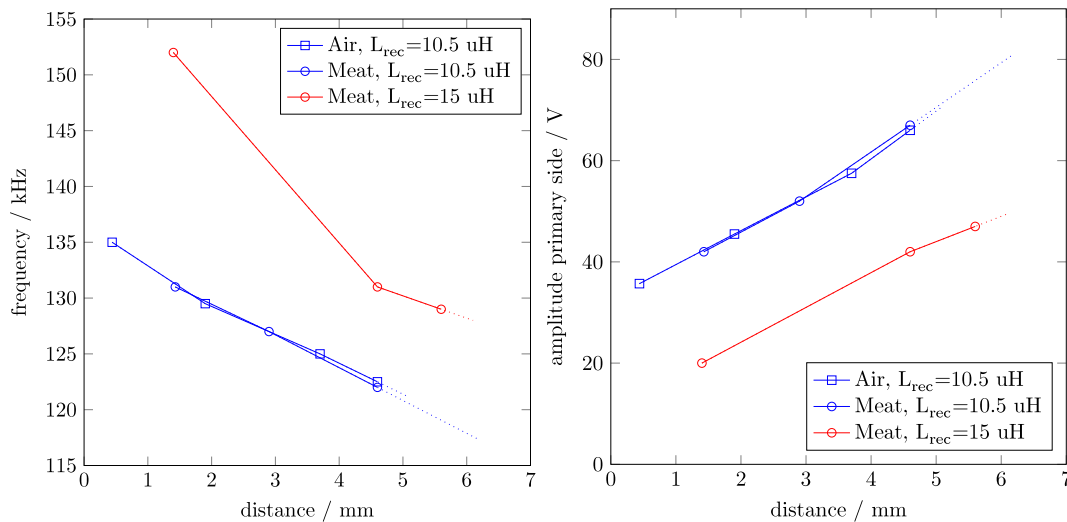

Figure 8. Wireless operation distances and according frequencies and primary voltages.

223 **Power link:** For the secondary side, we used a handwound coil (see figure 3) with 20 mm x 20  
 224 mm size and 18 turns of litz wire (20 x 0.05 mm individual wires). For the power-receiver IC we  
 225 used, the maximum distance is defined by the Qi standard (version 1.0) with 5mm. This requires  
 226 that the secondary coil is placed between skin and skull with two thin wires through the skull. Our  
 227 transmitter can bridge a distance of 4.5mm with the described coil ( $L=10.5\mu$ H,  $Q=1$ ). With a modified  
 228 receiver coil we reached 5.5mm ( $L=15\mu$ H,  $Q=0.76$ ). Figure 8 shows results of a range measurement,  
 229 and how the base station adjusts the field strength and frequency depending on the distance and



230 the inductance of the receiver coil. The figure shows no significant difference in the operation point  
 231 (frequency and voltage) for air or meat as transmission medium. The received rectified power was  
 232 set to 100mW for the experiment.

233 An update of the Qi standard [55] was announced, which will work over distances between  
 234 12mm and 45mm while being backwards compatible with the existing receivers. Furthermore,  
 235 the 'Rezence' standard from the alliance for wireless power was also announced to have similar  
 236 properties. These new standards are based on magnetic resonance which permit thick obstacles  
 237 between the primary and secondary coil. It is expected that an update of our implant to these new  
 238 standards will allow to place the secondary coil also under the skull.

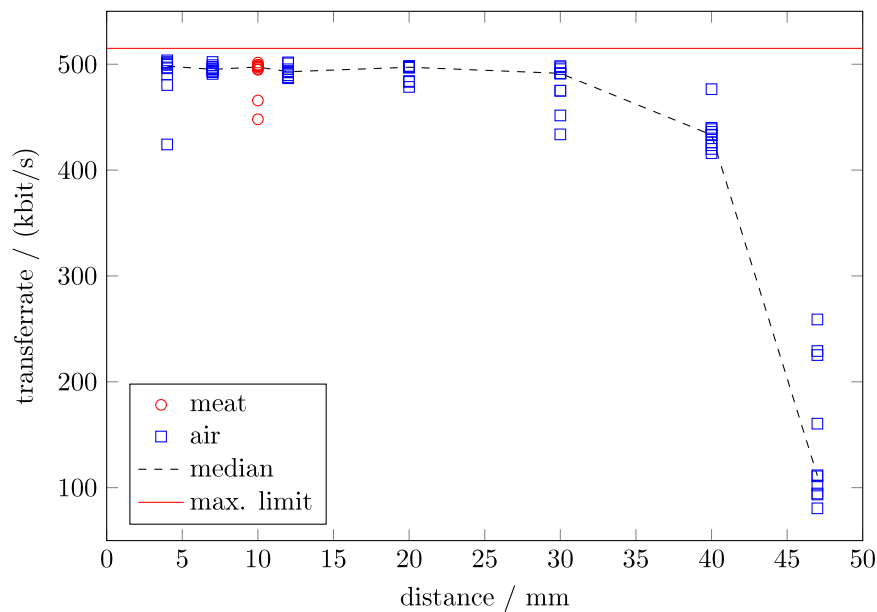

**Figure 9.** Data transfer rates for different distances.

239 **Data link:** We measured data transfer rates with the implant prototype in wireless operation  
 240 (Figure 9). For the measurement we configured the implant to sample 52 channels at 2kHz and  
 241 a resolution of 10 bits, which generates a data stream on the implant with 1.12 Mbit/s while the  
 242 Microsemi transceiver shows a limitation of 515 kbit/s. This guarantees a full TX-buffer and allows  
 243 to measure the maximal transmission performance. For each measurement condition (medium and  
 244 distance), a set of 10 data tracks was recorded, each containing 100,000 sample sets. The duration of  
 245 the transmission for each set was measured to reach the transmission rate.

246 For simulating in-vivo-measurements, we placed the implant prototype between two 1 cm thick  
 247 stacks of sliced meat. We also tested the implant in air and observed comparable transmission rates  
 248 at similar distances. Most important is the result that the data can be transmitted with almost maximum  
 249 transceiver speed through 10mm of meat. A data transmission was possible up to 47 mm, but with  
 250 a strongly reduced data rate due to the re-transmission of corrupted packets. Also under good  
 251 conditions some samples are lost, because the Microsemi transceiver is not optimized for real time  
 252 transfer but for good data integrity. The reason for the data loss lies in the limited amount of buffer  
 253 the ZL70102 owns. In the case that this transceiver's buffer is filled with a constant data rate, even  
 254 small transmission pauses will fill the ZL70102 buffer completely in a short amount of time. Data  
 255 needs to be discarded if it can not be buffered elsewhere on the implant. Time-stamps are included  
 256 by our implant electronics to reconstruct the timing, even if packets are lost.

## 257 2.5. Performance of the analog front end

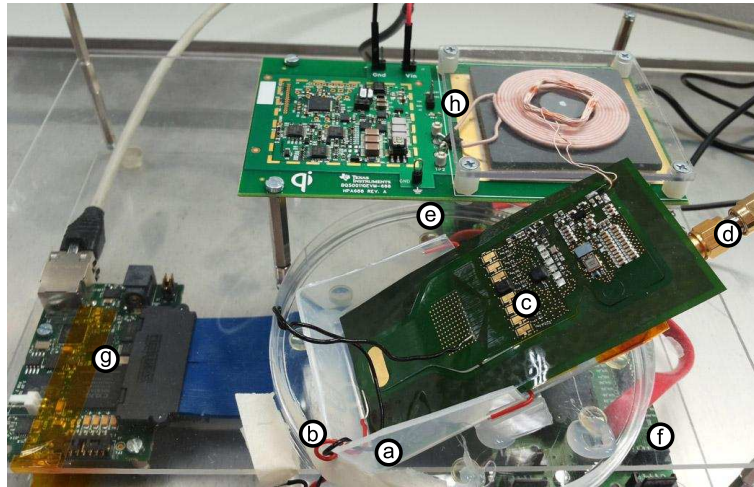

**Figure 10.** The complete system and measurement setup. A plastic box (a) is filled with Ringer Solution to simulate the fluids around the brain. The red and the black wire (b) are dipped into the fluid to apply a test stimulus between the electrodes and the reference electrode of the implant prototype (c). Underneath the implant lies the receiver antenna which is connected (d) to the base station receiver board (e). An adapter board (f) connects the receiver to the base station FPGA board (Orange Tree ZestET1) (g), which provides the data via Ethernet. The implant is powered using the TI bq25046EVM-687 kit board (e).

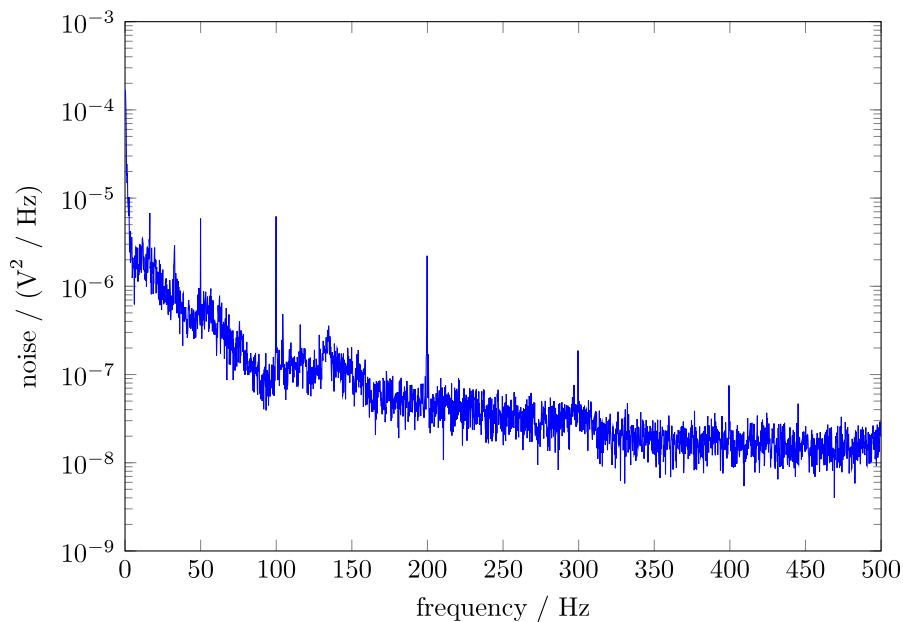

**Figure 11.** Noise spectrum for open inputs in Ringer solution.

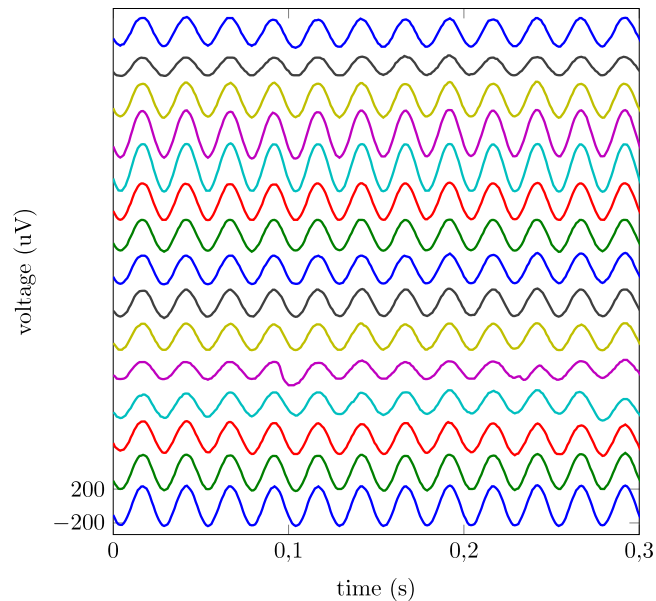

**Figure 12.** Received signals for a 40 Hz test signal. The amplitude depends on the distance between the stimulating wire and the channel electrode. The different channels are depicted in offset steps of  $400 \mu\text{V}$ .

258 For a rms-noise test, we analyzed the signals from a measurement, where the electrode array  
 259 of the implant prototype was placed in Ringer solution (Figure 10). Since many of the externally  
 260 produced PCB-foils had defects, we decided to use a repairable sample with only one Intan RHA2116  
 261 chip with 16 working channels. The prototype implant (with one RHA) was working in wireless  
 262 operation, sampling 16 channels with 1kHz and a resolution of 10 bits. The rms noise of the  
 263 measurement is  $7.9 \mu\text{V}$ . Figure 11 shows the spectrum of the system noise. Figure 12 shows what  
 264 sinusoidal waves look like when recorded with the analog front end of the implant.

265 **Tests in a real-world application:** First successful tests of the electronics on non-miniaturized,  
 266 non-wireless test boards were conducted in an animal experiment. Our goal was to test if the  
 267 functionality can be demonstrated under real-world conditions. We restricted our experiments in  
 268 line with the 3R-rules (reduce, refine, replace) to the recording sessions required for that purpose. In  
 269 a first test we connected the system via cables to electrodes which were already implanted in an awake  
 270 behaving animal (Macaca Mulatta) for a series of other neuro-research experiments. These implanted  
 271 electrodes [44] were based on the substrate which we planned to use for the next generation of our  
 272 flexible ECoG-implant.

273 We tried to repeat this with the miniaturized and fully wireless implant on the flexible substrate.  
 274 We soldered cables onto the individual electrodes of the implant. Similar to the first test, we plugged  
 275 the implant into the connector of a pre-implanted surface electrode grid. In contrast to the first test, a  
 276 problem with the system was revealed. In the case that the reference electrode of wireless system was  
 277 not grounded, the amplitude of the recorded signal was strongly reduced and the neuronal signal  
 278 nearly vanishes from the recorded time series. The reason for this behavior is not fully understood  
 279 yet.

280 One hypothesis is that this configuration allows the wireless power supply to induce an  
 281 additional, strong 100kHz sinusoidal signal on top of the neuronal signal at the inputs of the amplifier.  
 282 These combined signals are now larger than the threshold voltages of the Intan RHA's ESD protection  
 283 diodes of the analog input channels. As result, the protection diodes open a direct connection to  
 284 electrical ground which eradicates the signal.

285 In tests without animals, measurements with an oscilloscope of voltages differences between the  
 286 RHA's analog inputs and its reference revealed such voltages. A larger distance between the RHAs

287 and the energy transmitter/ energy harvesting coil may reduce the problem or switching to a different  
 288 kind of wireless energy link system might also remove this problem. We were able to confirm that  
 289 the wireless power supply still functions if the distance between the receiver and the coil is increased  
 290 to even 10cm. It has to be noted, that this problem could also be an artifact of the several tenth of  
 291 cm long cables soldered onto the electrodes for allowing the implant to be connected to the already  
 292 implanted electrode-grid. These cables could possibly act as an antennas which allow the induction  
 293 of these voltages. However, before we could determine reason of the problem or find a cure, the  
 294 financial support for the project ended.

## 295 2.6. Estimated power consumption of the implant

**Table 2.** Estimated power consumption of the implant's components.

| Component                     | power consumption                                  |
|-------------------------------|----------------------------------------------------|
| Microsemi ZL70102 transceiver | 17mW (measured)                                    |
| ASIC                          | up to 9.44mW (measured)                            |
| Clock quartz                  | 16.5mW (measured)                                  |
| RHA amplifier arrays          | 5mW (each IC) (measured)                           |
| DC/DC-Converter               | 8.5mW (for 1 RHA), 15mW (for 8 RHAs), (data-sheet) |
| TI inductive power receiver   | 10-40 mW (data-sheet)                              |

296 An estimate for the main electrical loads of the components of the implant are shown in table 2.  
 297 Combined with the losses of the power supply ICs, the fully equipped implant will dissipate about  
 298 110mW-140mW of power, while the intensively tested prototype with one RHA consumes about  
 299 73mW-103mW (both are presented in the next section). For safety reasons, the power receiver IC  
 300 is programmed not to accept more than 200mW to limit the production of heat in a case of failure.

## 301 2.7. Examining the implant's thermal properties

302 **Tissue Heating:** A major concern for neural implants is the heating of the tissue, as proteins  
 303 start denaturation at approximately 40°C. The IEEE Standard [56] states a brain temperature 40.5°C  
 304 as critical for a heat stroke. The tissue temperature close to the implant is affected by different heat  
 305 sources. Most critical is the joule heating of the implant electronics due to the high power densities  
 306 (e.g. 17mW in 9mm<sup>3</sup> for the transceiver IC). Due to the folded structure of our implant, all active  
 307 components are embedded inside the implant, which strongly increases the contact area to the tissue.

308 Another heat source are eddy currents from the inductive field of the power and data  
 309 transmission in the conductive tissue and in the implant. The eddy currents are expected to be  
 310 negligibly small, according to the stable operating point shown in Figure 8. Heating by the field  
 311 of the data transmission in the MICS-band can also be neglected. The whole RF transceiver only  
 312 consumes 17mW of power, only a percentage of it is really transformed into field energy.

313 Finally the joule heating of the base station coil, which has contact to the skin above the implant,  
 314 increases the temperature of the tissue. A simple countermeasure could be a cooling system over the  
 315 implant attached on the outside of the body.

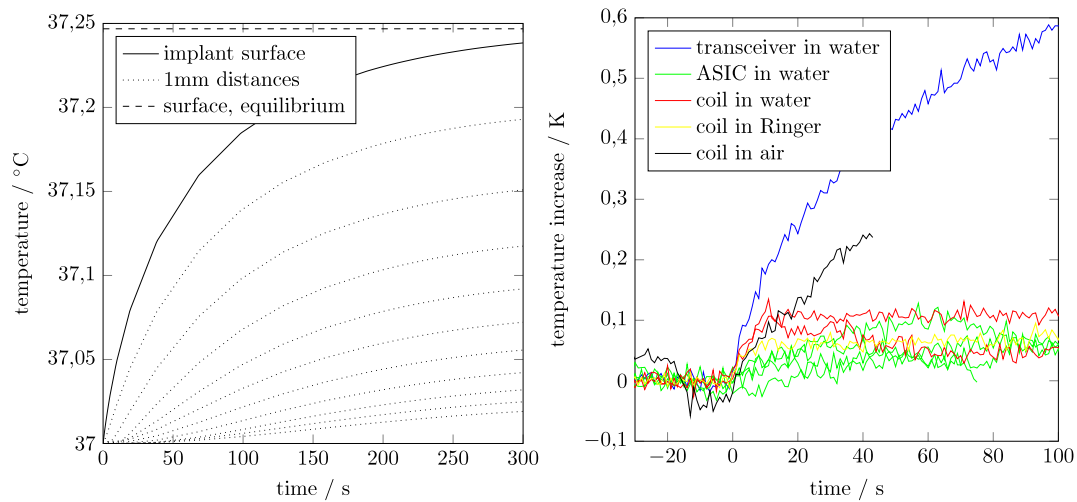

**Figure 13.** Left: Simulated heat-up. Right: Measured temperature increase after power on.

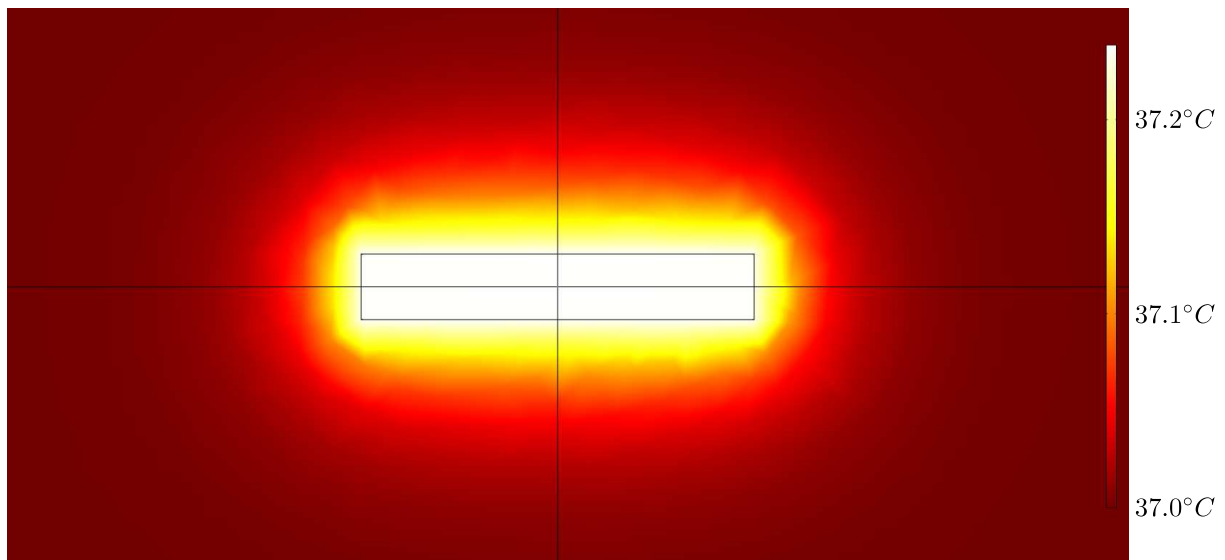

**Figure 14.** Temperature distribution after 300 seconds, calculated with a simple FEM model (COMSOL). Rectangle shows the 24mm x 4mm implant cross section dimensions.

316 **Simulation of joule heating:** As our prototype is equipped with only one amplifier array instead  
 317 of eight, we used a simple FEM model (COMSOL) to evaluate the heating of the final, fully assembled  
 318 and folded implant. We used the outer dimensions shown in Figure 7 and applied a heat source of  
 319 100 mW distributed over the volume of the implant. We chose 100mW for the simulation as an  
 320 estimation for the typical power dissipated by a fully equipped implant in operation. Actual values  
 321 might be lower or higher depending on the number of active RHAs and the actual efficiency of the  
 322 TI inductive power receiver, but they do not change the magnitude of the resulting temperatures.  
 323 Figure 13 shows the heat-up curves at the surface of the implant and at different distances within  
 324 living tissue. The temperature at the surface in thermal equilibrium is calculated to be 0.25K above  
 325 the starting temperature of 37°C, in a sphere with 10cm diameter and a border temperature of 37°C.  
 326 Additionally, Figure 14 shows a temperature map taken after 300 seconds, with the 24mm x 4mm  
 327 cross section of the implant positioned in the center.

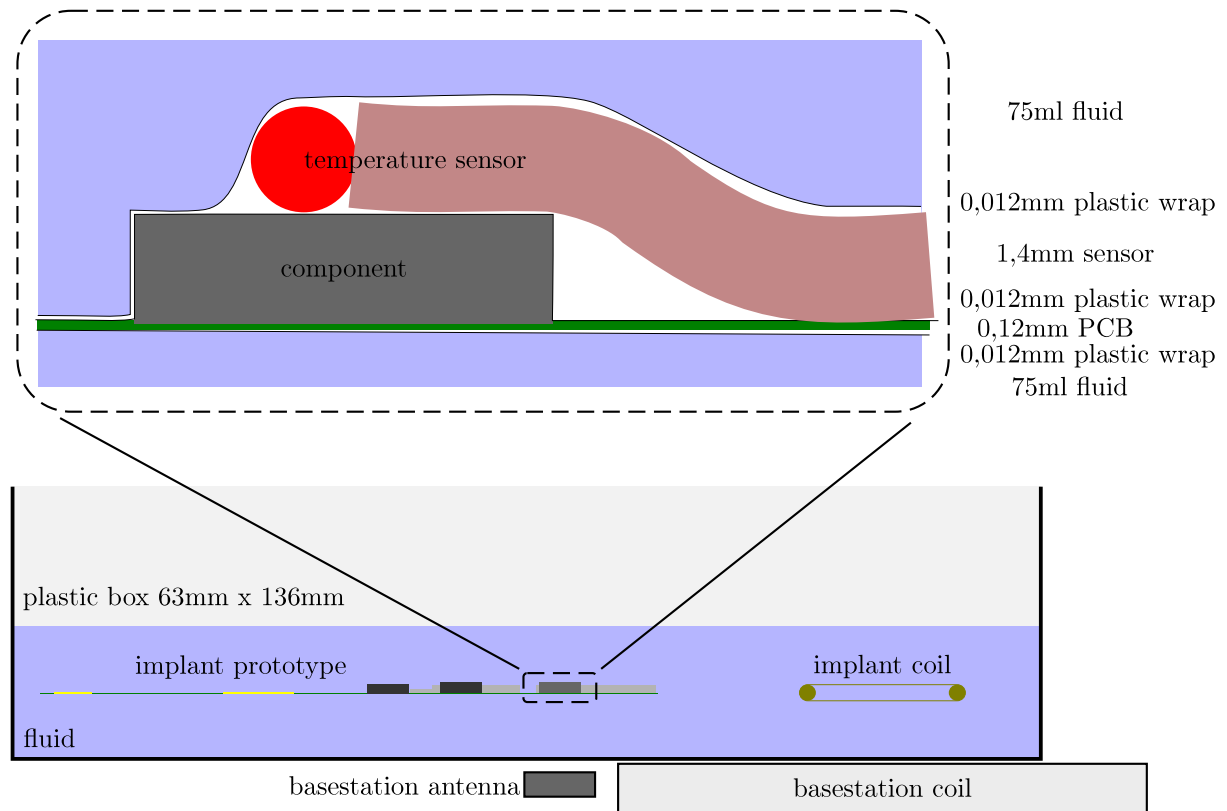

Figure 15. Measurement setup for testing the heating up of the implant.

328 **Measurement of total heating for the prototype:** In addition to the simulation, we made an  
 329 experiment to observe the heating in wireless operation. The measurement setup is shown in Figure  
 330 15. The implant prototype was isolated with a thin PCB-foil of plastic wrap against a liquid medium  
 331 (Ringer solution) with a volume of 150ml. For the temperature measurement we used a thermocouple  
 332 and contacted it to different parts of the implant. Based on the simulation, we expected the surface  
 333 temperature to be saturated after a few minutes. Longer test periods are not expected to provide  
 334 meaningful results, because in contrast to a living subject, the surrounding tissue (in our case 150ml  
 335 fluid) would heat up more and more because of the small volume and lack cooling by blood perfusion.

336 The black curve in Figure 13 shows a rapid joule heating of the coil in air, while the heating  
 337 saturates at approximately  $0.1^{\circ}\text{C}$  in water (red) and at even lower values in the conductive Ringer  
 338 solution (yellow). Close to the ASIC, which is covered under a  $0.75\text{mm}$  plastic housing and has a  
 339 power dissipation of  $9.44\text{mW}$ , we also measured a temperature increase below  $0.1^{\circ}\text{C}$ .

340 In contrast to the low heating at the ASIC, the blue curve shows the temperature on top of  
 341 the unencapsulated RF transceiver IC, which has a power dissipation of  $17\text{mW}$ . In Figure 7, the  
 342 transceiver is located behind the saw filter, which is ca.  $1\text{mm}$  higher than the transceiver IC. Thus,  
 343 after folding, the transceiver IC has no direct contact to the tissue. In our experiment, the PCB-foil  
 344 was not folded and we saw a strong temperature increase at the contact between the IC and the  
 345 liquid medium. The ground planes in the substrate are expected to distribute the thermal power  
 346 more equally to the outer implant surface.

### 347 3. Discussion

348 This article starts with the question if it is possible to design a fully wireless neuro-implant and  
 349 its external base-station such that the results can be reused by other groups as starting point for their  
 350 own technology development activities. As an answer, we present a system concept which can be  
 351 transferred into real hardware by using only commercial off-the-shelf components. This hardware

352 realization is explained in detail and its performance reported. Furthermore, an analysis concerning  
353 the heat development of the implant was conducted in measurements and simulations. Finally, all  
354 design files (circuit diagrams, boards, firmwares, and software as well as documentation concerning  
355 the development process) are made open source in the supplemental materials. We deliver two  
356 versions of firmwares for the Microsemi IGLOO nano FPGA. One was written for the Intan RHA2116,  
357 using undocumented ADC functionality, like the ASIC we used for the measurements with the  
358 flexible implant prototype and other firmware version which was optimized for using the newer  
359 Intan RHD2132.

360 **Comparison with other neuro-implants:** As a very important key-technology for future  
361 neuro-prostheses systems, building implantable systems is getting more and more popular. In  
362 contrast to other 'typical' systems, with our 128 channel system for measuring ECoG signals we  
363 developed an implant that can be placed completely under the skull and avoids energy storage  
364 elements (e.g. batteries) with a limited lifetime. We are convinced that it is very high important  
365 for long-term stability and safety that the skull can be closed completely again after implantation.  
366 This keeps the natural barrier against germs intact and prevents cerebral fluid leakages [28].

367 Another approach taken by [57] is to replace parts of the skull directly with the implant or  
368 components of the external base-station [58] but this leaves the skull constantly open.

369 A completely different approach was chosen by [35,59]. They developed a 100 channel recording  
370 unit (LFPs and action potentials) which can be implanted into the torso like a pacemaker. The system  
371 uses RF (3.2/3.8 GHz) and infra-red light for the wireless data transmission. The power is provided  
372 by a Li-ion battery and can be recharged with 2MHz electromagnetic waves. A similar approach  
373 is presented in [60]. There they use Bluetooth for exchanging data, a battery, and titan casing for  
374 recording from two times 64 channels. Such a battery has a limited lifetime which is clearly below the  
375 required several decades. This strategy can't be transferred to implants that will be installed under  
376 the skull. One major problem of neuro-implants, in comparisons e.g. to pacemakers, is that after  
377 some time scar-tissue or even bone encapsulates the part of the implant that is situated within the  
378 head. Without damaging the brain tissue, replacing the implant or parts of it (e.g. batteries) becomes  
379 very problematic. [61] presents a two times 32 channel recording system. This system is designed  
380 such that each of the 32 channels are implanted into separate cortical areas. It has inductive power  
381 supply and infra-red based data transmission. Part of the system is implanted under the skull and  
382 connected with wires to a data processing unit which is installed under the skin. [62] is an earlier  
383 version of [61], which again seems to be the predecessor of [35].

384 As equipment for research applications, we find a recording system for 32 channels using  
385 frequency-shift keying (FSK) modulation in the 4GHz range for data transmission and is powered by  
386 a battery [63]. This system is large (38mm x 38mm x 51mm in an aluminum enclosure) and installed  
387 outside of the subject. Also a lot of research effort went into the development of recording systems  
388 which can be put e.g. on top of freely moving or even flying insects. [64] demonstrates a four channel  
389 system that uses a 900MHz RF data link and a battery for providing power to the system. The weight  
390 of the system is very low. [65] presents a similar system which is able to record 10 channels with  
391 26.1K samples per second and 4 additional channels with 1.63k samples per second. For this system a  
392 battery is not required because it harvests energy from RF electromagnetic waves. [66] shows a device  
393 that can apply electrical stimulation to the central nervous system of a large beetle and control it.

394 The development of a fully implantable system based on the Utah needle array is shown in  
395 [67–70]. This system contains individual threshold-based action potential detectors for all its 100  
396 channels. It sends the detected spikes via a 900MHz data link to its base station. However, the system  
397 was tailored for recording the timing of action potentials and not of ECoG signals. For only one  
398 selected channel, the device is able to deliver the recorded time series with 15.7k samples per second.  
399 Energy is also provided via an inductive link. Also it is not yet clear if the approach with these needle  
400 arrays will work over several decades [71]. Our own experience shows that recording with surface  
401 electrode mats are much more long-term stable than with needle arrays.

402 In [72] the development of an integrated circuit for recording 128-channels with on-the-fly spike  
403 feature extraction and wireless telemetry is presented. It uses for data transmission UWB (ultra wide  
404 band with 90Mbit per second) and has no solution concerning the power supply. [73] presents an  
405 all-in-one chip solution for 32 recording channels. It is able to collect power via a 13.56MHz inductive  
406 link. Data is transmitted via 900MHz FSK coded. In [74] a complete chip-set for a 100 channel  
407 recording system is shown. It has an wireless data transfer unit and harvests energy via an inductive  
408 power link.

409 Concerning the individual components of such an implant [75–77] like e.g. bio-signal amplifiers  
410 [78–80], analog-to-digital converter [81–83], data processors [42,84], wireless data transfer sub-system  
411 [61,85–92], or energy harvesting [93,94] a large number of publications exist.

412 Many of those components, system parts, and system designs show remarkable performances  
413 but they are not freely available. The implant we present has lower specs compared to these highly  
414 optimized solutions but our system can be re-build by everybody and then be modified to your heart's  
415 content.

416 **Bio-compatibility:** One of the remaining obstacle preventing us from applying the system  
417 in-vivo, are long-term stable bio-compatible coatings which can protect the electronics from the harsh  
418 fluidic environment in the body. This coating has to stay intact over many years and has to be very  
419 thin and flexible. We designed the implant to be completely coated in a first processing step. In  
420 a second step, the coating must be removed from the electrodes and then the implant is folded at  
421 three folding lines for reducing the required area. Therefore, it is required that the coating is not only  
422 flexible but has a good adhesion to all the components. We expect that the adhesion between the  
423 coating (e.g. Parylene C) and the used material for the PCB-foil (DuPont Pyralux AP and insulating  
424 resist) might cause problems. This requires to change the substrate of the PCB-foil to something more  
425 suitable (e.g. Parylene C as well) and will hopefully give us the opportunity to reduce the thickness  
426 of the substrate for improving the bending radius of the PCB-foil. Currently, we are testing several  
427 promising candidates for coatings and substrates [43].

428 **Electrical stimulation:** Another goal for the future is to add comprehensive stimulation  
429 capabilities to the implant for allowing electrical stimulation of the brain tissue (e.g. for visual cortical  
430 prostheses). Our ASIC has the capability of stimulation. However, it can only create simple 3.3V  
431 uni-polar stimulation pulses (unregulated in current strength) on 8 extra pads. This was our very first  
432 step of including stimulation into a design. For the implant on the flexible substrate, we decided not  
433 to connect these outputs to the electrodes. Instead we focused our efforts [95] on developing better  
434 current pumps optimized for the high-voltage electrical stimulation with up to  $\pm 90V$  and  $\pm 10mA$   
435 [96], which is required for ultra high density surface grids with very small electrodes. In the case  
436 of stimulation with such high voltages, it is important to protect the sensitive analog-inputs of the  
437 recording system. High voltages can destroy the bio-signal amplifier which have a working range  
438 of several around 100mV. Even in the best case scenario, these amplifiers are overloaded and this  
439 will cause severe recording artifacts for many 10ms. In addition, the ESD protection diodes of the  
440 amplifiers' input channels will kick in and burn an undefined amount of current from the stimulation  
441 pulse. A solution against this problem lies in fast analog switches which can withstand such high  
442 voltages while keeping the distortion of the sub-mV neuronal signals as low as possible. We are also  
443 working on this kind of optimized switches for this special application [97].

444 **Possible improvements for the design:** Especially two aspects of the implant need improvement  
445 in future: 1.) By exchanging the power harvesting to magnetic resonance technology (the new Qi  
446 standard or the Rezence wireless power charging standard), the maximal operating distance between  
447 the primary and secondary coil can be increase to up to 40mm. In the actual state, our implant  
448 requires an energy harvesting coil between the skin and outside of the skull which is connected with  
449 two small wires to the implant under the skull. 2.) The effective data transmission rate is limited  
450 to 515kbit/s. For many applications this transmission rate is too low. We looked into the possibility  
451 of optical data transmission by infra-red light. Together with the BIAS (Bremen institute of applied



452 beam technology), we tested the feasibility of this idea by sending high-frequency signals through  
453 meat, skin and bones. We expect that data transfer rates of over 100MBit/s should be possible with  
454 optimized micro-optics and a vertical-cavity surface-emitting laser (VCSEL) on the implant as well as  
455 a suitable external receiver. If code division multiple access (CDMA) is used, even several implants  
456 can send information on the same wavelength. For the channel from the external base-station to the  
457 implant, the slow RF connection still can be used or also replaced by an IR data transmission (which  
458 is more challenging) on a different wavelength.

459 Ex-vivo tests have proven the feasibility of our system design. However, during first *in vivo*  
460 functionality tests, we ran into problems (for details see results) which never were seen during  
461 lab-bench tests. As a result, the amplitude of the measured neuronal signals nearly vanishes when  
462 the reference of the Intan RHA2116 and the base-station doesn't have a low impedance connection.  
463 Such a cable is not a requirement we want for a wireless system. The reason for this is still unclear and  
464 maybe an artifact of the very special measurement setup (e.g. long cables soldered onto the electrodes  
465 of the flexible implant as a connection to an additional electrode which was already implanted in the  
466 animal) or the close distance between the energy coil placement and the rest of the implant. After  
467 solving this problem, real *in vivo* tests need to be performed in order to verify the system performance  
468 under real measurement conditions. This information is required to estimate the development steps  
469 that have to be taken for making the system safe enough for using it for human patients.

470 **In summary**, the actual state of the implant is not yet ready for implantation, especially not for  
471 long-term implantation in medical applications. Several problems have still to be solved in future  
472 development. Nevertheless, we deliver an open source tool kit completely based on commercial  
473 off-the-shelf components. This collection contains circuit diagrams, board designs, FPGA firmwares,  
474 and software which allows interested researchers to develop their own wireless neuro-implant  
475 without starting from scratch.

#### 476 4. Materials and Methods

477 All experimental procedures using animals were approved by the local authorities (Der Senator  
478 fuer Gesundheit, November 11 2014) and were in accordance with the 3R-principles, the regulation  
479 for the welfare of experimental animals, issued by the federal government of Germany and with the  
480 guidelines of the European Union (Council Directive 2010/63/EU) for care and use of laboratory  
481 animals.

482 **Supplementary Materials:** In the supplemental data we present the design files for the firmwares, software and  
483 PCB designs as open source as well as documentation concerning the development process.

484 **Acknowledgments:** We thank Norbert Hauser, Alexander Svojanovsky, and Mario Kaiser from Brain Products  
485 as well as Guido Widman and Christian Elger from the department of epileptology at the university hospital  
486 of Bonn for fruitful discussions. We thank Sunita Mandon and Tobias Tessmann from the University of Bremen  
487 for their support. This work was supported in part by Bundesministerium fuer Bildung und Forschung, Grant  
488 01 EZ 0867 (Innovationswettbewerb Medizintechnik) and Grant 01 GQ 1106 (Bernstein Award Udo Ernst) as  
489 well as Research-Focus Neurotechnology University of Bremen, and the Creative Unit I-See 'The artificial eye:  
490 Chronic wireless interface to the visual cortex' at the University of Bremen. Also this work was supported by the  
491 Deutsche Forschungsgemeinschaft priority program SPP 1665 'Resolving and manipulating neuronal networks  
492 in the mammalian brain - from correlative to causal analysis' (LA 1471/11-1).

493 **Author Contributions:** D.R. and J.P. wrote the paper. K.R.P. and D.R. initiated and supervised the research in this  
494 project. D.R., J.H., J.P., W.L., D.P.D., S.P., K.R.P. and A.K. developed the system concept. J.P. and J.H. prepared  
495 and conducted the test and startup. J.P. performed the measurements. H.S. and A.K. performed the animal  
496 experiments. J.P. and J.H. developed the ASIC. D.R. designed the PCBs and PCB-foil for the implant, the wireless  
497 module as well as the base station. D.R. wrote the firmwares for the basestation's FPGA and the nano FPGAs  
498 as well as the corresponding software package. D.B. worked on the wireless power transfer. S.P. provided  
499 the infrastructure for development, design and testing of the mixed signal circuitry. D.P.D. contributed the  
500 electronic design methodologies of the mixed signal circuitry. T.S. and M.S. developed the antennas. T.S., D.R.,  
501 and M.S. created the corresponding antenna matching circuits. T.S. developed and built the energy harvesting  
502 coils. W.L. was responsible for the clean room technology. W.L. and E.T. contributed to the layout and realization  
503 of electrodes. D.G. contributed to the tests of the base station.

504 **Conflicts of Interest:** The authors declare no conflict of interest.

**Bibliography**

- 506 1. Schiller, P.H.; Tehovnik, E.J. Visual prosthesis. *Perception* **2008**, *37*, 1529–1559.
- 507 2. Dobbelle, W.H. Artificial Vision for the Blind by Connecting a Television Camera to the Visual Cortex. *ASAIO Journal (American Society for Artificial Internal Organs)* **1999**, *46.1*, 3–9.
- 508 3. Schmidt, E.M.; Bak, M.J.; Hambrecht, F.T.; Kufta, C.V.; O'Rourke, D.; Valiathan, P. Feasibility of a  
509 visual prosthesis for the blind based on intracortical microstimulation of the visual cortex. *Brain* **1996**,  
510 *119*, 507–522.
- 511 4. van Gerven, M.; Farquhar, J.; Schaefer, R.; Vlek, R.; Geuze, J.; Nijholt, A.; Ramsey, N.; Haselager, P.;  
512 Vuurpijl, L.; Gielen, S.; Desain, P. The brain–computer interface cycle. *Journal of Neural Engineering* **2009**,  
513 *6*.
- 514 5. Andersen, R.; Hwang, E.; Mulliken, G. Cognitive Neural Prosthetics. *Annu. Rev. Psychol.* **2010**,  
515 *61*, 169–190.
- 516 6. Lebedev, M.; Nicolelis, M. Brain-machine interfaces: past, present and future. *Trends Neurosci.* **2006**,  
517 *29(9)*, 536–546.
- 518 7. Ifft, R.; Lebedev, M.; Nicolelis, M. Reprogramming movements: extraction of motor intentions from  
519 cortical ensemble activity when movement goals change. *Front Neuroeng.* **2012**, *5(16)*.
- 520 8. Wang, W.; Collinger, J.L.; Degenhart, A.D.; Tyler-Kabara, E.C.; Schwartz, A.B.; Moran, D.W.; Weber, D.J.;  
521 Wodlinger, B.; Vinjamuri, R.K.; Ashmore, R.C.; Kelly, J.W.; Boninger, M.L. An electrocorticographic brain  
522 interface in an individual with tetraplegia. *PLoS one* **2013**, *8*, e55344.
- 523 9. Hochberg, L.; Serruya, M.; Friehs, G.; Mukand, J.; Saleh, M.; Caplan, A.; Branner, A.; Chen, D.; Penn, R.;  
524 Donoghue, J. Neuronal ensemble control of prosthetic devices by a human with tetraplegia. *Nature* **2006**,  
525 *442*, 164–171.
- 526 10. Simeral, J.; Kim, S.P.; Black, M.; Donoghue, J.; Hochberg, L.R. Neural control of cursor trajectory and click  
527 by a human with tetraplegia 1000 days after implant of an intracortical microelectrode. *Journal of Neural*  
528 *Engineering* **2011**.
- 529 11. Lebedev, M.; Tate, A.; Hanson, T.; Z, Z.L.; O'Doherty, J.; Winans, J.; Ifft, P.; Zhuang, K.; Fitzsimmons, N.;  
530 Schwarz, D.; Fuller, A.; An, J.; Nicolelis, M. Future developments in brain-machine interface research.  
531 *Clinics (Sao Paulo)* **2011**, *66*, 25–32.
- 532 12. Velliste, M.; Perel, S.; Spalding, M.; Whitford, A.; Schwartz, A. Cortical control of a prosthetic arm for  
533 self-feeding. *Nature* **2008**, *453*, 1098–1101.
- 534 13. Musallam, S.; Corneil, B.; Greger, B.; Scherberger, H.; Andersen, R. Cognitive Control Signals for Neural  
535 Prosthetics. *Science* **2004**, *305*, 258–262.
- 536 14. Moran, D. Evolution of brain–computer interface: action potentials, local field potentials and  
537 electrocorticograms. *Current Opinion in Neurobiology* **2010**, *20(6)*, 741–745.
- 538 15. Jarosiewicz, B.; Sarma, A.A.; Bacher, D.; Masse, N.Y.; Simeral, J.D.; Sorice, B.; Oakley, E.M.; Blabe, C.;  
539 Pandarinath, C.; Gilja, V.; others. Virtual typing by people with tetraplegia using a self-calibrating  
540 intracortical brain–computer interface. *Science translational medicine* **2015**, *7*, 313ra179–313ra179.
- 541 16. Rotermund, D.; Ernst, U.A.; Mandon, S.; Taylor, K.; Smiyukha, Y.; Kreiter, A.K.; Pawelzik, K.R. Toward  
542 high performance, weakly invasive Brain Computer Interfaces using selective visual attention. *The Journal*  
543 *of Neuroscience* **2013**, *33(14)*, 6001–6011.
- 544 17. Schalk, G. Can Electroencephalography (EEG) Support Robust and Powerful Brain–Computer Interfaces?  
545 *Front Neuroengineering*. **2010**, *3:9*.
- 546 18. Pistohl, T.; Schulze-Bonhage, A.; Aertsen, A.; Mehring, C.; Ball, T. Decoding natural grasp types from  
547 human EEG. *NeuroImage* **2012**, *59*, 248–260.
- 548 19. Pistohl, T.; Ball, T.; Aertsen, A.; Mehring, C. Prediction of arm movement trajectories from  
549 EEG-recordings in humans. *Journal of Neuroscience Methods* **2008**, *167*, 105–114.
- 550 20. Brunner, P.; Ritaccio, A.; Emrich, J.; Bischof, H.; Schalk, G. Rapid communication with a  
551 P300 matrix speller using electrocorticographic signals (EEG). *Front. Neurosci.* **2011**, *5:5*, doi:  
552 10.3389/fnins.2011.00005.
- 553 21. Leuthardt, E.; Schalk, G.; Wolpaw, J.; Ojemann, J.; Moran, D. A brain–computer interface using  
554 electrocorticographic signals in humans. *Journal of Neural Engineering* **2004**, *1*, 63–71.
- 555

- 556 22. Rotermund, D.; Ernst, U.; Pawelzik, K. Towards On-line Adaptation of Neuro-prostheses with Neuronal  
557 Evaluation Signals. *Biological Cybernetics* **2006**, *95*, 243—257.
- 558 23. Wu, W.; Hatsopoulos, N. Real-time decoding of nonstationary neural activity in motor cortex. *IEEE Trans*  
559 *Neural Syst Rehabil Eng.* **2008**, *16*(3), 213–222.
- 560 24. Li, Z.; O’Doherty, J.; Lebedev, M.; Nicolelis, M. Adaptive decoding for brain-machine interfaces through  
561 Bayesian parameter updates. *Neural Comput.* **2011**, *23*(12), 3162–3204.
- 562 25. Silay, K.M.; Dehollain, C.; Declercq, M. Numerical analysis of temperature elevation in the head due  
563 to power dissipation in a cortical implant. *Engineering in Medicine and Biology Society* **2008**, *30th Annual*  
564 *International Conference of the IEEE.*
- 565 26. Kim, S.; Tathireddy, P.; Normann, R.A.; Solzbacher, F. In vitro and in vivo study of temperature increases  
566 in the brain due to a neural implant." *Neural Engineering. CNE’07* **2007**.
- 567 27. Kim, S.; Tathireddy, P.; Normann, R.A.; Solzbacher, F. Thermal Impact of an Active 3-D Microelectrode  
568 Array Implanted in the Brain. *IEEE TRANSACTIONS ON NEURAL SYSTEMS AND REHABILITATION*  
569 *ENGINEERING* **2007**, *15*(4), 493–501.
- 570 28. Voges, J.; Waerzeggers, Y.; Maarouf, M.; Lehrke, R.; Koulousakis, A.; Lenartz, D.; Sturm, V. Deep-brain  
571 stimulation: long-term analysis of complications caused by hardware and surgery – experiences from a  
572 single centre. *J Neurol Neurosurg Psychiatry.* **2006**, *77*(7), 868—872.
- 573 29. Lee, W.S.; Lee, J.K.; Lee, S.A.; Kang, J.K.; Ko, T.S. Complications and results of subdural grid electrode  
574 implantation in epilepsy surgery. *Surg Neurol* **2000**, *54*, 346–351.
- 575 30. Nair, D.R.; Burgess, R.; McIntyre, C.C.; Lueders, H. Chronic subdural electrodes in the management of  
576 epilepsy. *Clinical Neurophysiology* **2008**, *119*(1), 11–28.
- 577 31. Asgarian, F.; Sodagar, A.M. Wireless Telemetry for Implantable Biomedical Microsystems. *Biomedical*  
578 *Engineering, Trends in Electronics, Communications and Software* **2011**, pp. 21–44.
- 579 32. Chae, M.S.; Yang, Z.; Yuce, M.R.; Hoang, L.; Liu, W. A 128-channel 6 mW wireless neural recording IC  
580 with spike feature extraction and UWB transmitter. *Neural Systems and Rehabilitation Engineering, IEEE*  
581 *Transactions on* **2009**, *17*, 312–321.
- 582 33. Liu, Y.H.; Li, C.L.; Lin, T.H. A 200-pJ/b MUX-Based RF transmitter for implantable multichannel neural  
583 recording. *IEEE Transactions on Microwave Theory and Techniques* **2009**, *57*(10), 2533–2541.
- 584 34. Navaii, M.L.; Jalali, M.; Sadjedi, H. An ultra-low power RF interface for wireless-implantable  
585 microsystems. *Microelectronics Journal* **2012**, *43*, 848 – 856.
- 586 35. Borton, D.A.; Yin, M.; Aceros, J.; Nurmikko, A. An implantable wireless neural interface for recording  
587 cortical circuit dynamics in moving primates. *Journal of Neural Engineering* **2013**, *10*(2), 026010.
- 588 36. Schwerdt, H.N.; Xu, W.; Shekhar, S.; Abbaspour-Tamijani, A.; Towe, B.C.; Miranda, F.A.; Chae, J. A  
589 Fully-Passive Wireless Microsystem for Recording of Neuropotentials using RF Backscattering Methods.  
590 *J Microelectromech Syst.* **2011**, *20*(5), 1119–1130.
- 591 37. Aubert, H. RFID Technology for Human Implant Devices. *Comptes Rendus Physique* **2011**, *12.7*, 675–683.
- 592 38. Olivo, J.; Carrara, S.; Micheli, G.D. Energy Harvesting and Remote Powering for Implantable Biosensors.  
593 *IEEE SENSORS JOURNAL* **2011**, *11*(7), 1573.
- 594 39. Rapoport, B.I.; Kedzierski, J.T.; Sarpeshkar, R. A Glucose Fuel Cell for Implantable Brain–Machine  
595 Interfaces. *PLoS ONE* **2012**, *7*(6), e38436.
- 596 40. Ho, J.S.; Yeh, A.J.; Neofytou, E.; Kim, S.; Tanabe, Y.; Patlolla, B.; Beygui, R.E.; Poon, A.S.Y. Wireless power  
597 transfer to deep-tissue microimplants. *PNAS* **2014**, *111*, 7974–7979.
- 598 41. Pistor, J.; Hoeffmann, J.; Peters-Drolshagen, D.; Paul, S. A Programmable Neural Measurement System  
599 for Spikes and Local Field Potentials. *DTIP Aix-en-Provence* **2011**.
- 600 42. Pistor, J.; Hoeffmann, J.; Rotermund, D.; Tolstosheeva, E.; Schellenberg, T.; Boll, D.; Gordillo-Gonzalez,  
601 V.; Mandon, S.; Peters-Drolshagen, D.; Kreiter, A.K.; Schneider, M.; Lang, W.; Pawelzik, K.R.; Paul, S.  
602 Development of a fully implantable recording system for ECoG signals. *Design, Automation and Test in*  
603 *Europe* **2013**.
- 604 43. Tolstosheeva, E.; Hoeffmann, J.; Pistor, J.; Rotermund, D.; Schellenberg, T.; Boll, D.; Hertzberg, T.;  
605 Gordillo-Gonzalez, V.; Mandon, S.; Peters-Drolshagen, D.; Schneider, M.; Pawelzik, K.R.; Kreiter, A.K.;  
606 Paul, S.; Lang, W. Towards a Wireless and fully-implantable ECoG System. *Transducers - The 17th*  
607 *International Conference on Solid-State Sensors, Actuators and Microsystems* **2013**, p. M3P.095.

- 608 44. Tolstosheeva, E.; Gordillo-Gonzalez, V.; Hertzberg, T.; Kempen, L.; Michels, I.; Kreiter, A.; Lang, W. A  
609 novel flex-rigid and soft-release ECoG array. *33rd Annual International IEEE EMBS Conference* **2011**.
- 610 45. TI. *bqTESLA Portfolio of Wireless Power Solutions*. Texas Instruments, 2011.
- 611 46. TI. *bq25046EVM-687 Evaluation Module*. Texas Instruments, 2010. SLVU420.
- 612 47. TI. *bq51013-Integrated Wireless Power Supply Receiver, Qi (Wireless Power Consortium) Compliant*. Texas  
613 Instruments, 2012. SLVSAT9D.
- 614 48. Torex. *XCL206-Inductor Built-in Step-Down micro DC/DC Converters*. Torex, 2011.
- 615 49. Microsemi. *ZL70102-Medical Implantable RF Transceiver MICS RF Telemetry*. Microsemi, 2010.
- 616 50. NDK. *NZ2016S Series - Crystal Clock Oscillator*. NDK, 2013.
- 617 51. Hoeffmann, J.; J.Pistor.; Peters-Drolshagen, D.; Tolstosheeva, E.; Lang, W.; Paul, S. Biomedical-ASIC With  
618 Reconfigurable Data Path For In Vivo Multi/Micro-Electrode Recordings Of Bio-potentials. *MEA Meeting*  
619 *2012* **2012**.
- 620 52. RFMonolithics. *RF2607D-403.5 MHz SAW Filter*. RF Monolithics, Inc., 2010.
- 621 53. Microsemi. *ZL70120 MICS-Band RF Base Station Module (BSM)*. Microsemi, 2013. Rev. 4.
- 622 54. OrangeTreeTechnologies. *ZestET1: GigE TOE & FPGA Module*. Orange Tree Technologies, 2013.
- 623 55. WPC, W.P.C. WPC TO DEMO WORLDS MOST ADVANCED RESONANT WIRELESS CHARGING  
624 SYSTEM COMPATIBLE WITH EXISTING 40+ MILLION QI PHONES **2014**.
- 625 56. IEEE. IEEE Standard for Safety Levels with Respect to Human Exposure to Radio Frequency  
626 Electromagnetic Fields, 3 kHz to 300 GHz. *IEEE Standard for Safety Levels with Respect to Human Exposure*  
627 *to Radio Frequency Electromagnetic Fields, 3 kHz to 300 GHz* **2006**, p. 98.
- 628 57. Charvet, G.; Sauter-Starace, F.; M.Foerster.; Ratel, D.; Chabrol, C.; Porcherot, J.; Robinet, S.; Reverdy,  
629 J.; D'Errico, R.; Mestais, C.; Benabid, A. WIMAGINE: 64-channel ECoG recording implant for human  
630 applications. *Engineering in Medicine and Biology Society (EMBC), 2013 35th Annual International Conference*  
631 *of the IEEE* **2013**, pp. 2756–2759.
- 632 58. Muller, R.; Hanh-Phuc, L.; Wen, L.; Ledochowitsch, P.; Gambini, S.; Bjorninen, T.; Koralek, A.; Carmena, J.;  
633 Maharbiz, M.; Alon, E.; Rabaey, J. 24.1 A miniaturized 64-channel 225 $\mu$ W wireless electrocorticographic  
634 neural sensor. *Solid-State Circuits Conference Digest of Technical Papers (ISSCC)* **2014**, pp. 412–412.
- 635 59. Yin, M.; Borton, D.; Aceros, J.; Patterson, W.; Nurmikko, A.V. A 100-channel hermetically sealed  
636 implantable device for wireless neurosensing applications. *Circuits and Systems (ISCAS)* **2012**, pp.  
637 2629–2632.
- 638 60. Hirata, M.; Matsushita, K.; Suzuki, T.; Yoshida, T.; Sato, F.; Morris, S.; Yanagisawa, T.; Goto, T.; Kawato,  
639 M.; Yoshimine, T. A Fully-Implantable Wireless System for Human Brain-Machine Interfaces Using Brain  
640 Surface Electrodes: W-HERBS. *IEICE TRANSACTIONS on Communications* **2011**, E94-B(9), 2448–2453.
- 641 61. Aceros, J.; Yin, M.; Borton, D.; Patterson, W.; Nurmikko, A. A 32-channel fully implantable wireless  
642 neurosensor for simultaneous recording from two cortical regions. *Annual International Conference of the*  
643 *IEEE Engineering in Medicine and Biology Society* **2011**, pp. 2300–2306.
- 644 62. Song, Y.K.; Borton, D.A.; Park, S.; Patterson, W.R.; Bull, C.W.; Laiwalla, F.; Mislow, J.; Simeral,  
645 J.D.; Donoghue, J.P.; Nurmikko, A.V. Active microelectronic neurosensor arrays for implantable brain  
646 communication interfaces. *IEEE transactions on neural systems and rehabilitation engineering: a publication of*  
647 *the IEEE Engineering in Medicine and Biology Society* **2009**, 17, 339.
- 648 63. Miranda, H.; Gilja, V.; Chestek, C.A.; Shenoy, K.V.; Meng, T.H. HermesD: A high-rate long-range wireless  
649 transmission system for simultaneous multichannel neural recording applications. *IEEE Transactions on*  
650 *Biomedical Circuits and Systems* **2010**, 4, 181–191.
- 651 64. Harrison, R.R.; Fotowat, H.; Chan, R.; Kier, R.J.; Olberg, R.; Leonardo, A.; Gabbiani, F. Wireless  
652 neural/EMG telemetry systems for small freely moving animals. *IEEE transactions on biomedical circuits*  
653 *and systems* **2011**, 5, 103–111.
- 654 65. Thomas, S.J.; Harrison, R.R.; Leonardo, A.; Reynolds, M.S. A battery-free multichannel digital  
655 neural/EMG telemetry system for flying insects. *IEEE transactions on biomedical circuits and systems* **2012**,  
656 6, 424–436.
- 657 66. Sato, H.; Berry, C.W.; Peeri, Y.; Baghoomian, E.; Casey, B.E.; Lavella, G.; VandenBrooks, J.M.; Harrison, J.;  
658 Maharbiz, M.M. Remote radio control of insect flight. *Frontiers in integrative neuroscience* **2009**, 3, 24.
- 659 67. Sharma, A.; Rieth, L.; Tathireddy, P.; Harrison, R.; Oppermann, H.; Klein, M.; Topper, M.; Jung, E.;  
660 Normann, R.; Clark, G.; Solzbacher, F. Evaluation of the packaging and encapsulation reliability in

- 661 fully integrated, fully wireless 100 channel Utah Slant Electrode Array (USEA): Implications for long  
662 term functionality. *16th International Solid-State Sensors, Actuators and Microsystems Conference* **2011**, pp.  
663 1204–1207.
- 664 68. Harrison, R.R.; Kier, R.J.; Chestek, C.A.; Gilja, V.; Nuyujukian, P.; Ryu, S.; Greger, B.; Solzbacher, F.;  
665 Shenoy, K.V. Wireless neural recording with single low-power integrated circuit. *IEEE transactions on*  
666 *neural systems and rehabilitation engineering* **2009**, *17*, 322–329.
- 667 69. Harrison, R.R.; Kier, R.J.; Kim, S.; Rieth, L.; Warren, D.J.; Ledbetter, N.M.; Clark, G.A.; Solzbacher, F.;  
668 Chestek, C.A.; Gilja, V.; others. A wireless neural interface for chronic recording. 2008 IEEE Biomedical  
669 Circuits and Systems Conference. IEEE, 2008, pp. 125–128.
- 670 70. Kim, S.; Bhandari, R.; Klein, M.; Negi, S.; Rieth, L.; Tathireddy, P.; Toepfer, M.; Oppermann, H.;  
671 Solzbacher, F. Integrated wireless neural interface based on the Utah electrode array. *Biomedical*  
672 *microdevices* **2009**, *11*, 453–466.
- 673 71. Barrese, J.C.; Rao, N.; Paroo, K.; Triebwasser, C.; Vargas-Irwin, C.; Franquemont, L.; Donoghue, J.P. Failure  
674 mode analysis of silicon-based intracortical microelectrode arrays in non-human primates. *Journal of*  
675 *Neural Engineering* **2013**, *10*, 066014.
- 676 72. Chae, M.S.; Yang, Z.; Yuce, M.R.; Hoang, L.; Liu, W. A 128-channel 6 mW wireless neural recording IC  
677 with spike feature extraction and UWB transmitter. *IEEE Transactions on Neural Systems and Rehabilitation*  
678 *Engineering* **2009**, *17*, 312–321.
- 679 73. Lee, S.B.; Lee, H.M.; Kiani, M.; Jow, U.M.; Ghovanloo, M. An inductively powered scalable 32-channel  
680 wireless neural recording system-on-a-chip for neuroscience applications. *IEEE transactions on biomedical*  
681 *circuits and systems* **2010**, *4*, 360–371.
- 682 74. Harrison, R.R.; Kier, R.J.; Kim, S.; Rieth, L.; Warren, D.J.; Ledbetter, N.M.; Clark, G.A.; Solzbacher, F.;  
683 Chestek, C.A.; Gilja, V.; others. 100-Channel wireless neural recording system with 54-Mb/s data link  
684 and 40%-efficiency power link. Solid State Circuits Conference (A-SSCC), 2012 IEEE Asian. IEEE, 2012,  
685 pp. 185–188.
- 686 75. Gosselin, B. Recent advances in neural recording microsystems. *Sensors* **2011**, *11*, 4572–4597.
- 687 76. Gilja, V.; Chestek, C.A.; Diester, I.; Henderson, J.M.; Deisseroth, K.; Shenoy, K.V. Challenges and  
688 opportunities for next-generation intracortically based neural prostheses. *IEEE Transactions on Biomedical*  
689 *Engineering* **2011**, *58*, 1891–1899.
- 690 77. Wise, K.D. Wireless integrated microsystems: Wearable and implantable devices for improved health  
691 care. TRANSDUCERS 2009-2009 International Solid-State Sensors, Actuators and Microsystems  
692 Conference. IEEE, 2009, pp. 1–8.
- 693 78. Harrison, R.R.; Charles, C. A low-power low-noise CMOS amplifier for neural recording applications.  
694 *IEEE Journal of solid-state circuits* **2003**, *38*, 958–965.
- 695 79. Zhang, F.; Holleman, J.; Otis, B.P. Design of ultra-low power biopotential amplifiers for biosignal  
696 acquisition applications. *IEEE transactions on biomedical circuits and systems* **2012**, *6*, 344–355.
- 697 80. Zhang, X.; Pei, W.; Huang, B.; Chen, J.; Guan, N.; Chen, H. Implantable microsystem for wireless neural  
698 recording applications. Complex Medical Engineering, 2009. CME. ICME International Conference on.  
699 IEEE, 2009, pp. 1–4.
- 700 81. Wattanapanitch, W.; Sarpeshkar, R. A low-power 32-channel digitally programmable neural recording  
701 integrated circuit. *IEEE Transactions on Biomedical Circuits and Systems* **2011**, *5*, 592–602.
- 702 82. Lopez, C.M.; Prodanov, D.; Braeken, D.; Gligorijevic, I.; Eberle, W.; Bartic, C.; Puers, R.; Gielen, G.  
703 A multichannel integrated circuit for electrical recording of neural activity, with independent channel  
704 programmability. *IEEE transactions on biomedical circuits and systems* **2012**, *6*, 101–110.
- 705 83. Sharma, A.; Rieth, L.; Tathireddy, P.; Harrison, R.; Oppermann, H.; Klein, M.; Töpfer, M.; Jung, E.;  
706 Normann, R.; Clark, G.; others. Evaluation of the packaging and encapsulation reliability in fully  
707 integrated, fully wireless 100 channel Utah Slant Electrode Array (USEA): Implications for long term  
708 functionality. *Sensors and Actuators A: Physical* **2012**, *188*, 167–172.
- 709 84. Zhang, F.; Aghagolzadeh, M.; Oweiss, K. A low-power implantable neuroprocessor on nano-FPGA for  
710 brain machine interface applications. 2011 IEEE International Conference on Acoustics, Speech and Signal  
711 Processing (ICASSP). IEEE, 2011, pp. 1593–1596.
- 712 85. Ferguson, J.E.; Redish, A.D. Wireless communication with implanted medical devices using the  
713 conductive properties of the body. *Expert review of medical devices* **2011**, *8*, 427–433.

- 714 86. Aubert, H. RFID technology for human implant devices. *Comptes Rendus Physique* **2011**, *12*, 675–683.
- 715 87. Asgarian, F.; Sodagar, A.M. *Wireless telemetry for implantable biomedical microsystems*; INTECH Open Access  
716 Publisher, 2011.
- 717 88. Navaii, M.L.; Jalali, M.; Sadjedi, H. An ultra-low power RF interface for wireless-implantable  
718 microsystems. *Microelectronics Journal* **2012**, *43*, 848–856.
- 719 89. Hannan, M.A.; Abbas, S.M.; Samad, S.A.; Hussain, A. Modulation techniques for biomedical implanted  
720 devices and their challenges. *Sensors* **2011**, *12*, 297–319.
- 721 90. Liu, Y.H.; Li, C.L.; Lin, T.H. A 200-pJ/b MUX-based RF transmitter for implantable multichannel neural  
722 recording. *IEEE Transactions on Microwave Theory and Techniques* **2009**, *57*, 2533–2541.
- 723 91. Schwerdt, H.N.; Xu, W.; Shekhar, S.; Abbaspour-Tamijani, A.; Towe, B.C.; Miranda, F.A.; Chae, J. A fully  
724 passive wireless microsystem for recording of neuropotentials using RF backscattering methods. *Journal*  
725 *of Microelectromechanical Systems* **2011**, *20*, 1119–1130.
- 726 92. Damestani, Y.; Reynolds, C.L.; Szu, J.; Hsu, M.S.; Kodera, Y.; Binder, D.K.; Park, B.H.; Garay, J.E.;  
727 Rao, M.P.; Aguilar, G. Transparent nanocrystalline yttria-stabilized-zirconia calvarium prosthesis.  
728 *Nanomedicine: Nanotechnology, Biology and Medicine* **2013**, *9*, 1135–1138.
- 729 93. Olivo, J.; Carrara, S.; De Micheli, G. Energy harvesting and remote powering for implantable biosensors.  
730 *IEEE Sensors Journal* **2011**, *11*, 1573–1586.
- 731 94. Rapoport, B.I.; Kedzierski, J.T.; Sarpeshkar, R. A glucose fuel cell for implantable brain–machine  
732 interfaces. *PLoS one* **2012**, *7*, e38436.
- 733 95. Pistor, J.; Heidmann, N.; Höffmann, J.; Paul, S. Programmable Current Source for Implantable Neural  
734 Stimulation Systems. *Procedia Engineering* **2014**, *87*, 324–327.
- 735 96. Osipov, D.; Paul, S.; Stokov, S.; Kreiter, A.K. A new current stimulator architecture for visual cortex  
736 stimulation. Nordic Circuits and Systems Conference (NORCAS): NORCHIP & International Symposium  
737 on System-on-Chip (SoC), 2015. IEEE, 2015, pp. 1–4.
- 738 97. Osipov, D.; Paul, S. A novel HV-switch scheme with gate-source overvoltage protection for bidirectional  
739 neural interfaces. 2015 IEEE International Conference on Electronics, Circuits, and Systems (ICECS).  
740 IEEE, 2015, pp. 25–28.
